# 1 Upstream translation initiation expands the 2 coding capacity of segmented negative-strand 3 RNA viruses 4

## 5 Authors

6 Elizabeth Sloan<sup>1</sup>, Marta Alenquer<sup>2</sup>, Liliane Chung<sup>3</sup>, Sara Clohisey<sup>3</sup>, Adam M. Dinan<sup>4</sup>, Robert  
7 Gifford<sup>1</sup>, Quan Gu<sup>1</sup>, Nerea Irigoyen<sup>4</sup>, Joshua D. Jones<sup>4,5</sup>, Ingeborg van Knippenberg<sup>1,6</sup>,  
8 Veronica Rezelj<sup>1,7</sup>, Bo Wang<sup>3</sup>, Helen M. Wise<sup>3</sup>, Maria Joao Amorim<sup>2</sup>, J Kenneth Baillie<sup>3</sup>, Ian  
9 Brierley<sup>4</sup>, Paul Digard<sup>3</sup>, Andrew E. Firth<sup>3</sup>, Megan K. MacLeod<sup>8</sup> and Edward Hutchinson<sup>1,\*</sup>.

10

11 <sup>1</sup>MRC-University of Glasgow Centre for Virus Research, Glasgow, UK.

12 <sup>2</sup>Instituto Gulbenkian de Ciência, Oeiras, Portugal.

13 <sup>3</sup>The Roslin Institute, University of Edinburgh, Edinburgh, UK.

14 <sup>4</sup>Division of Virology, Department of Pathology, University of Cambridge, Cambridge, UK.

15 <sup>5</sup>Current address: Infection Medicine, Edinburgh Medical School: Biomedical Sciences,  
16 University of Edinburgh, Edinburgh, UK.

17 <sup>6</sup>Current address: Department of Learning and Teaching Enhancement, Sighthill Court,  
18 Edinburgh Napier University, Edinburgh, UK.

19 <sup>7</sup>Current address: Viral Populations and Pathogenesis Unit, Department of Virology, Institut  
20 Pasteur, CNRS UMR 3569, Paris, France.

21 <sup>8</sup>Centre for Immunobiology, Institute of Infection, Immunity and Inflammation, University of  
22 Glasgow, Glasgow, UK.

23 \* Corresponding author: [Edward.Hutchinson@glasgow.ac.uk](mailto:Edward.Hutchinson@glasgow.ac.uk); MRC-University of Glasgow  
24 Centre for Virus Research, Sir Michael Stoker Building, Garscube Campus, 464 Bearsden  
25 Road, Glasgow G61 1QH, Scotland (UK).

26

## 27 **Abstract**

28 Segmented negative-strand RNA viruses (sNSVs) include the influenza viruses, the  
29 bunyaviruses, and other major pathogens of humans, other animals and plants. The genomes  
30 of these viruses are extremely short. In response to this severe genetic constraint, sNSVs use  
31 a variety of strategies to maximise their coding potential. Because the eukaryotic hosts  
32 parasitized by sNSVs can regulate gene expression through low levels of translation initiation  
33 upstream of their canonical open reading frames (ORFs), we asked whether sNSVs could use  
34 upstream translation initiation to expand their own genetic repertoires. Consistent with this  
35 hypothesis, we showed that influenza A viruses (IAVs) and bunyaviruses were capable of  
36 upstream translation initiation. Using a combination of reporter assays and viral infections,  
37 we found that upstream translation in IAVs can initiate in two unusual ways: through non-  
38 AUG initiation in virally encoded ‘untranslated’ regions, and through the appropriation of an  
39 AUG-containing leader sequence from host mRNAs through viral cap-snatching, a process  
40 we termed ‘start-snatching.’ Finally, while upstream translation of cellular genes is mainly  
41 regulatory, for sNSVs it also has the potential to create novel viral gene products. If in frame  
42 with a viral ORF, this creates N-extensions of canonical viral proteins. If not, it allows the  
43 expression of cryptic overlapping ORFs, which we found were highly conserved in IAV and  
44 widely distributed in peribunyaviruses. Thus, by exploiting their host’s capacity for upstream  
45 translation initiation, sNSVs can expand still further the coding potential of their extremely  
46 compact RNA genomes.

## 47 **Key words**

48 Segmented negative-strand RNA virus, influenza A virus, peribunyavirus, upstream  
49 translation, non-canonical translation

## 50 **Abbreviations**

51 HRTV: Heartland virus, IAV: influenza A virus, ORF: open reading frame, OROV:  
52 Oropouche virus, WT: wild type, MHC: major histocompatibility complex, RPF: ribosome-  
53 protected fragment, sNSV: segmented negative-strand RNA virus, UTR: untranslated region,  
54 uORF: upstream ORF.

55

56

## 57 Introduction

58 Viruses operate under extreme coding constraints. Their small size, replication strategies and  
59 high replication error rates severely limit the total length of their genomes, particularly for the  
60 error-prone RNA viruses [1,2]. As a result, viruses have evolved diverse strategies to increase  
61 their coding potential [1,3]. For example the influenza viruses, whose RNA genomes are less  
62 than 14 kb in length, are known to encode alternative gene products through mechanisms  
63 including alternative splicing, ambisense coding, leaky ribosomal scanning, ribosomal  
64 frameshifting and termination-dependent re-initiation [4–7]. As viruses lack their own protein  
65 synthesis machinery, they must be able to encode all of their proteins in a form that host  
66 ribosomes will recognise as mRNA [8]. In eukaryotes, ribosomes recognise mRNAs with a  
67 terminal 5' cap structure followed by an untranslated region (UTR), which can be tens to  
68 hundreds of nucleotides in length [9–11]. A growing body of work has shown that translation  
69 initiates at low levels in the 5' UTRs of a large proportion of eukaryotic mRNAs, sometimes  
70 extremely close to the 5' cap, and that translation of the resulting upstream open reading  
71 frames (uORFs) can regulate cellular gene expression [10,12–18]. As a result, the need to  
72 mimic their host's mRNA structure could provide viruses with the potential to exploit  
73 upstream translation initiation, something which could allow them to expand the coding  
74 potential of their own genomes.

75 To determine whether this was the case, we examined segmented, negative-strand RNA  
76 viruses (sNSVs). These include the orthomyxovirus family (which includes the influenza  
77 viruses) and the order of bunyaviruses (which include the aetiological agents of haemorrhagic  
78 fevers and other severe human illnesses, as well as many other pathogens of humans, animals  
79 and plants). The sNSVs are a useful order of viruses in which to search for upstream  
80 translation initiation for three reasons. Firstly, as RNA viruses they are already known to  
81 employ a variety of alternative coding strategies in response to genetic constraints, which  
82 suggests that they may also have undergone selection for additional alternative coding  
83 methods. Secondly, each segment of an sNSV genome produces its own mRNAs with  
84 distinct 5' UTRs, and this diversity of viral 5' UTRs increased the likelihood that we might  
85 observe upstream translation initiation. Thirdly, sNSVs produce their mRNA through cap-  
86 snatching, a process in which 7-methylguanylate (m<sup>7</sup>G)-capped 5' termini are cleaved from  
87 host mRNAs to provide RNA primers for the transcription of viral genes [11]. The length of

88 cap-snatched host sequences varies, but cap-snatching typically results in 10 – 13 nt of host  
89 encoded-sequence being appended to the 5' end of the mRNAs of IAV [19–22] and 11 – 18  
90 nt to the mRNAs of the bunyaviruses [23–27]. In other words, as a result of cap-snatching  
91 sNSVs produce chimeric mRNAs in which host 5' UTR sequences are present upstream of  
92 the virally-templated 5' UTR. It seemed plausible that, if upstream translation initiation was  
93 occurring in host mRNAs, it might also occur in these chimeric viral mRNAs.

94 To determine whether upstream translation initiation could occur in sNSVs, we examined  
95 three viruses: the orthomyxovirus influenza A virus (IAV), a cause of influenza in humans  
96 and other animals and the cause of all influenza pandemics [28], and two bunyaviruses: the  
97 tick-borne phenuivirus Heartland virus [29] and the midge-borne peribunyavirus Oropouche  
98 virus [30]. We demonstrated that, consistent with our hypothesis, each of these viruses is  
99 capable of upstream translation initiation. Focussing on IAV, we showed that upstream  
100 translation initiation takes place through two distinct routes – initiation within the virally-  
101 encoded 5' UTR, and initiation still further upstream in the host-derived cap-snatched leader.  
102 This second route produces chimeric gene products in a process we termed ‘start-snatching.’  
103 We found that either route for upstream translation can, depending on viral sequence,  
104 produce N-terminal fusions to viral proteins, and we identify an example of such an N-  
105 terminally extended proteins within influenza virions. In addition, it is possible for upstream  
106 translation to access cryptic uORFs that overlap the canonical viral open reading frame  
107 (ORF). We discovered that the genetic potential to generate such uORFs is widely distributed  
108 in influenza viruses and in peribunyaviruses, and in the case of IAV we found evidence that  
109 uORFs are conserved, can be translated and can be presented to the adaptive immune system.  
110 We conclude that upstream translation initiation is a previously unappreciated mechanism for  
111 expanding the genetic capacity of sNSVs, increasing still further the ability of these viruses to  
112 encode a diverse array of gene products in a constrained genome.

## 113 Results

### 114 Upstream translation initiation occurs in segmented negative-strand viruses

115 We tested the hypothesis that upstream translation initiation could occur in sNSVs using  
116 minireplicon assays, transfection-based systems that generate reporter proteins through viral  
117 gene expression. In these assays the viral polymerase and nucleoprotein transcribe a negative-  
118 strand template RNA, consisting of a reporter gene flanked by viral UTRs, into an mRNA  
119 which is translated to give the reporter protein. We used minireplicon systems encoding

120 luciferase (Luc) reporters to test the transcriptional machineries of three sNSVs – an  
121 orthomyxovirus (the influenza A virus (IAV) A/WSN/33(H1N1) (WSN); NS segment UTRs),  
122 a phenuivirus (Heartland banyangvirus (HRTV); L segment UTRs) and a peribunyavirus  
123 (Oropouche orthobunyavirus (OROV); M segment UTRs).

124 We first determined how much of the reporter signal was due to translation initiation at sites  
125 up to and including the first AUG in the construct, which we refer to as the canonical start, as  
126 opposed to cryptic downstream translation initiation. To do this, we compared WT reporter  
127 constructs to WT-STOP mutants, in which the canonical start was followed by two in-frame  
128 stop codons (Fig 1A). These downstream stop codons substantially reduced reporter  
129 expression in all three systems, suggesting that most translation initiated either at, or  
130 upstream of, the canonical start (Fig 1B).

131 We next compared translation initiation at the canonical start with initiation upstream of this  
132 position. To do this, we suppressed translation from the canonical start by mutating it from  
133 AUG to GUA (M1V). As expected, when followed by stop codons (M1V-STOP) these  
134 mutants behaved similarly to WT-STOP, with only a slight decrease in reporter attenuation  
135 (Fig 1B). However, in the absence of downstream stop codons, M1V mutants gave  
136 substantially higher reporter expression than WT-STOP (Fig 1B). For OROV and HRTV this  
137 increase was 2.3- and 8.0-fold, respectively, while for IAV the increase was 125-fold (Fig  
138 1B). This showed that appreciable levels of translation can initiate from the 5' ends of sNSV  
139 transcripts, even in the absence of a canonical start codon.

140 This unexpected reporter expression could be explained in two ways: by upstream translation  
141 initiation, or by non-canonical initiation from the mutated start codon. Distinguishing  
142 between these possibilities required us to mutate the viral 5' UTR, but doing so in a  
143 minireplicon system is problematic as UTR sequences are required for normal viral  
144 transcription. To remove the need for processing by viral transcriptional machinery, we took  
145 the reporter construct with the most pronounced M1V phenotype, IAV NS, and cloned it in  
146 the positive sense into the cellular RNA polymerase II-transcribed mRNA expression vector  
147 pcDNA3A [31], introducing two in-frame stop codons upstream of the cloning site to exclude  
148 translation initiation from vector sequences (Fig 1C). Transfection of this construct into cells  
149 resulted in robust reporter expression. As in the minireplicon system, the WT-STOP and  
150 M1V-STOP mutations strongly attenuated reporter expression and the attenuation of M1V  
151 was partially alleviated when the downstream stop was removed (Fig 1D). The same effect

152 was observed with the 5' UTRs of the IAV PB2 and NP segments (segments 1 and 5,  
153 respectively; note that for segment 1 the start codon was abolished with an AUG to AUC  
154 mutation (M1I) to avoid creating a new AUG; Fig 1D). This suggested that translation  
155 initiation within a viral 5' UTR was a property of the sequence itself and did not necessarily  
156 require some special property of the viral transcriptional machinery.

157 As we could now mutate sequences in the viral 5' UTR without compromising transcription,  
158 we introduced in-frame stop codon towards the 3' end of the 5' UTRs, just upstream of the  
159 mutated start sites (STOP(end)-M1V; Fig 1C). For each of the three segments tested,  
160 expression from STOP(end)-M1V was substantially less than expression from M1V,  
161 suggesting that the increased reporter expression of M1V constructs compared to WT-STOP  
162 constructs was largely attributable to translation initiation upstream of the mutated start  
163 codon rather than from the mutated start codon itself (Fig 1D). We concluded that translation  
164 initiates at appreciable levels within the 5' UTR sequences of IAV genes.

165 We next wished to look for evidence of upstream translation initiation in actual viral  
166 infections. To do this we infected cells with IAV, immobilised translating ribosomes by flash  
167 freezing, and performed ribosomal profiling (Ribo-Seq) of mRNAs. We were able to map  
168 assembled ribosomes to the UTRs of mRNAs transcribed from all eight viral segments, as  
169 well as to the UTRs of host mRNAs (Fig 1E, F; Supplementary Fig S1). Our measures of  
170 ribosome density are only semi-quantitative, but given that only one third of positions in the  
171 UTR would be in-frame with a reporter gene, the ratios of ribosomal density on UTRs to that  
172 on the canonical gene is consistent with the levels of upstream reporter translation observed  
173 in our minireplicon assays. We concluded that upstream translation initiation can occur in  
174 the 5' UTRs of sNSV mRNAs.

### 175 Upstream translation initiates from segment-specific viral untranslated regions

176 We next mapped sites of upstream translation initiation. Using IAV pcDNA3A reporters, we  
177 compared the effects of in-frame stop codons at different positions in the 5' UTR of the M1V  
178 constructs – at the 5' end of the viral UTR sequence (STOP(begin)-M1V); at a point between  
179 the terminal 12 nt, which are conserved across all IAV segments, and the segment-specific  
180 UTR sequence downstream of this (STOP(mid)-M1V); and at a point towards the 3' end of  
181 the viral 5' UTR (STOP(end)-M1V; Fig 1G,H). For all three segments tested, stop codons at  
182 the beginning and middle of the sequence did not reduce reporter expression, indicating that

183 translation initiation in the viral 5' UTRs occurred mainly in the segment-specific 3' end of  
184 the UTR, rather than in the conserved 5' end (Fig 1I).

185 Comparing reporter expression from the STOP(mid)-M1V and STOP(end)-M1V constructs  
186 suggested that the efficiency of upstream translation initiation in these segment-specific  
187 sequences varied between segments, with the luciferase signal attributable to the (mid)-(end)  
188 regions of segments 8, 1 and 5 (NS, PB2 and NP) in the ratio 115 : 15 : 1 (Fig 1I). As a  
189 further test for sequence specificity, we inserted a stop codon in the middle of the long  
190 segment-specific UTR of IAV segment 5 (NP; STOP(mid2)-M1V). This had little effect on  
191 reporter expression indicating that, for this segment, translation of the 5' UTR initiated  
192 mainly towards the 3' end of the 5' UTR. We therefore concluded that when translation  
193 initiates in the 5' UTRs of IAV mRNAs it does so in a segment-specific, sequence-dependent  
194 manner.

#### 195 [Additional upstream translation initiates through 'start-snatching'](#)

196 We next sought to map upstream translation initiation within viral transcripts. When we  
197 examined the precise location of ribosomes in viral UTRs using our Ribo-Seq data, we found  
198 that the strongest ribosomal density was typically at the 3' ends of the UTRs, consistent with  
199 the results of our reporter assays (Fig 1F). However, for the segments that returned the  
200 highest number of ribosome-protected fragments (RPFs; segments 5, 7 and 8, encoding the  
201 NP, M and NS genes respectively) it was possible to detect ribosomes even in the conserved  
202 terminal 5' UTR sequences. This could not be explained by translation initiation in the  
203 segment-specific region of the 5' UTR, as observed in our reporter assays, and suggested that  
204 in the context of viral infection there was an additional mechanism for translation initiation  
205 even further upstream.

206 We searched for further evidence of upstream translation during IAV infection by looking for  
207 evidence of novel viral proteins. To do this we purified IAV virions, extracted proteins,  
208 digested these with trypsin and searched for evidence of N-terminally extended viral proteins  
209 by mass spectrometry, broadening our search parameters to include proteins initiating at non-  
210 AUG positions. We repeatedly identified peptides that mapped to an in-frame translation of  
211 the UTR of segment 5 (NP), giving an N-terminally extended protein we termed NP-UTR  
212 (Fig 2A, B; Supplementary Fig S2, Supplementary Table S1). The peptides mapping to the  
213 UTR sequence were detected at only a small proportion of the average intensity of peptides  
214 mapping to the downstream NP sequence, suggesting that NP-UTR was a low-frequency



215 variant of NP (Fig 2C). Notably, peptides identifying NP-UTR spanned almost the full extent  
216 of the NP 5' UTR, including the conserved 5' sequences (Fig 2B). Indeed, as the N-termini of  
217 these tryptic peptides mapped to tryptic cleavage sites, it is probable that their translation  
218 initiated still further upstream. This, combined with the lack of translation initiation within  
219 the terminal 5' sequence observed in minireplicon assays, suggested that translation of IAV  
220 mRNAs could initiate at sites upstream of the viral 5' UTR.

221 The apparently contradictory finding of translation initiation upstream of the 5' UTR is  
222 plausible for an sNSV, as these viruses produce mRNAs by cap-snatching. We reasoned that  
223 start codons within the cap-snatched leader could provide additional sites for upstream  
224 translation initiation. These sites would be appended to mRNAs produced by the viral  
225 transcriptional machinery, but would be absent in the products of our pcDNA3A reporter  
226 assay which were transcribed by cellular RNA Polymerase II. We therefore asked whether  
227 IAV cap-snatched leader sequences contained AUG codons at a high enough frequency to  
228 explain the translation of proteins such as NP-UTR. To do this, we infected cells with IAV  
229 and sequenced viral mRNAs by Cap Analysis Gene Expression (CAGE) sequencing. Because  
230 IAV infections profoundly alter the mRNA pool of IAV infected cells [22,32], we sequenced  
231 mRNA at timepoints throughout the first 24 h of infection. We found that approximately 10%  
232 of cap-snatched leader sequences contained an AUG (Fig 2D; Supplementary Fig S3). This  
233 proportion was consistent for mRNAs from all IAV genome segments and declined only  
234 slightly over the first 24 h of infection (Fig 2D) without an obvious preference for AUG  
235 position within the leader (Supplementary Fig S4). We then compared our results to a  
236 previously-published deep-sequencing description of IAV cap-snatched sequences [20].  
237 Despite differences in methodology, we were able to identify AUGs in a comparable  
238 percentage of the cap-snatched leaders of viral mRNAs when using data from this study  
239 (Supplementary Fig S5).

240 Thus, cap-snatching by IAV can acquire start codons suitable for the upstream translation of  
241 the entire virally-encoded UTR, a process which would account for our detection of the  
242 extended NP-UTR protein in virions. We termed this additional upstream translation  
243 initiation process 'start-snatching.'



## 244 Upstream translation initiation allows the expression of cryptic viral open reading 245 frames

246 When we considered the two modes of upstream translation initiation that we had identified  
247 in sNSVs, we realised that both of them could create novel viral gene products in two  
248 different ways.

249 One would be to create short N-terminal extensions to a segment's major gene product(s) by  
250 translating the 5' UTR, as we had observed with IAV NP-UTR. Sequence analysis of the  
251 strains used in our minireplicon assays showed that this would be possible for six of the eight  
252 genome segments of the IAV strain used (influenza A/WSN/33(H1N1); WSN) and two of the  
253 three segments of OROV and HRTV; in the other segments the 5' UTR contained an in-frame  
254 stop codon.

255 The other route for creating novel gene products would be if translation initiated out of frame  
256 with the major gene product, accessing a cryptic overlapping 5' reading frame (Fig 3A;  
257 Supplementary Fig S6). In the strains used in our minireplicon assays, we found overlapping  
258 5' ORFs encoding polypeptides that were comparable in length to previously identified short  
259 proteins (defined here as > 20 codons [33–35]) in frame 3 of IAV segments 1 – 4 (PB2, PB1,  
260 PA and HA) and of OROV segments 1 – 3 (L, M and S). In contrast, the overlapping 5' ORFs  
261 in HRTV were shorter. Because of this difference between OROV and HRTV we searched  
262 for overlapping 5' ORFs in the complete genome sequences of 78 different peribunyavirus  
263 species, and we found that there were overlapping 5' ORFs of >20 codons in 62% of L genes,  
264 90% of M genes and 73% of S genes (Supplementary Fig S7, Supplementary Tables S2 – S4).  
265 In the case of IAV considerably more sequence data were available, allowing us to determine  
266 the conservation of the overlapping 5' ORFs in frame 3. To do this we compared between  
267 23,000 and 43,000 IAV strains, depending on the segment. We found that the majority of  
268 frame 3 ORFs for each segment were of consistent lengths, and that the sequences they  
269 encoded were highly conserved (Fig 3B). We concluded that sNSVs often have the genetic  
270 potential to access cryptic 5' uORFs through upstream translation initiation, and that in the  
271 case of IAV these uORFs can be highly conserved.

272 We wished to determine whether the conserved overlapping frame 3 (F3) ORFs in segments  
273 1 – 4 of IAV, which we termed PB2-F3, PB1-F3, PA-F3 and HA-F3, respectively, were  
274 critical for viral replication. We tested this by reverse genetics, creating viruses with point  
275 mutations near the start of the F3 ORFs that were synonymous in frame 1, and which in

276 frame 3 could be either conservative mutations (F3-Ctrl) or stop mutations (F3-STOP;  
277 Supplementary Fig S8A). As WSN is a heavily laboratory-adapted strain of the virus we also  
278 mutated the mouse-adapted near-clinical isolate, influenza virus A/California/04/2009(H1N1)  
279 (maCa04; Supplementary Fig S8B). When mutating frame 3, we observed no differences  
280 between the growth kinetics of WT, F3-STOP and F3-Ctrl viruses, either when growing  
281 WSN in MDCK cells (Fig 3C) or when growing maCa04 in human lung A549 cells (Fig 3D).  
282 We also infected mice with the mutant PB2-F3 and PB1-F3 maCa04 viruses, and observed no  
283 differences in pathogenicity between the WT, F3-STOP and F3-Ctrl viruses (Fig 3E). Thus,  
284 although the coding potential of F3 proteins is highly conserved in naturally circulating  
285 strains of influenza virus (Fig 3B), they appear to be dispensable in laboratory conditions. We  
286 note that this, like their apparently low levels of expression, is consistent with the properties  
287 of previously-characterised IAV accessory proteins [6].

288 In addition to modulating viral gene expression directly, viral proteins within infected cells  
289 are presented to the immune system by MHC I. If conserved, as the IAV F3 proteins appear  
290 to be, this can provide targets for immune responses in future infections. To ask whether F3  
291 proteins could be presented by MHC I and recognised by the immune system, as well as to  
292 test whether in principle F3 ORFs could be translated, we created a modified IAV containing  
293 a frame 3 insertion of OVAI (OVA 257-264; SL8; SIINFEKL), a class I-restricted epitope of  
294 ovalbumin. We inserted OVAI into segment 8 (NS) of the virus, deleting a number of  
295 naturally-occurring F3 stops to create a cryptic 5' ORF so that we could exploit the tolerance  
296 of a linker region in the NS1 gene to insertion mutations (NS-F3.SIIN; Supplementary Fig S9)  
297 [36]. To ask whether the F3 5' ORF was translated we treated bone marrow derived dendritic  
298 cells (BMDCs) with a sonicated IAV antigen preparation and then incubated these with  
299 purified CD8 T cells from OTI mice (Fig 3F). Little or no OTI activation was observed with  
300 mock-infected DCs, but the NS-F3.SIIN virus preparation resulted in robust OTI activation,  
301 as measured by levels of the activation markers CD44, CD25 and CD69. This was  
302 comparable to the activation seen following treatment with purified OVAI peptide or to a  
303 control experiment using a virus in which we had inserted OVAI, in frame 1, into the stem  
304 region of the viral NA protein (NA-SIIN; [37]). We concluded from this that cryptic 5' ORFs  
305 of sNSVs, accessible through upstream translation initiation, can be expressed by infected  
306 cells, and moreover that the products of these cryptic ORFs can be presented to the immune  
307 system.

## 308 Discussion

309 Our results show that upstream translation initiation, a process that regulates the expression  
310 of a large proportion of cellular genes [10,12–15,38], is also exploited by the sNSVs that  
311 parasitize those cells. This finding is of general relevance to virology: given our finding that  
312 translation can initiate even in the short virally-encoded 5' UTRs of IAV (Fig 1 G-I), it is  
313 plausible that upstream initiation occurs in the 5' UTRs of many other eukaryotic viruses.  
314 Indeed, it is important to note that the viral UTRs we examined in this study do not contain  
315 AUG codons, meaning that translation initiation in these regions is presumably from non-  
316 AUG codons, a common if low-level effect in both host and viral genes [4,39,40]. Our data  
317 therefore add to a growing number of reports of upstream translation initiating on virally-  
318 encoded sequences, in some cases with clear regulatory effects [4,41–46]. On the basis of our  
319 results we would argue that upstream translation of viral genes should not be discounted,  
320 even in the absence of virally-encoded AUGs.

321 The reliance of sNSVs on cap-snatching for mRNA synthesis makes upstream translation  
322 initiation in these viruses particularly interesting. Our data indicate that for sNSVs, upstream  
323 translation can initiate not only on virally encoded sequences, but also in the short host-  
324 encoded sequences appropriated by cap-snatching (Fig 2). This 'start-snatching' would  
325 require functional start codons extremely close to the 5' end of cellular mRNAs. Start codons  
326 of this sort, referred to as Translation Initiator of Short 5' UTR (TISU) motifs, have been  
327 reported in approximately 4 % of mammalian mRNAs, being particularly common in  
328 'housekeeping' genes [16–18]. We note that this figure is comparable to the ribosomal  
329 density we observed on the 5' UTRs of viral mRNAs (Fig 1E) and is compatible with the 8 –  
330 10 % of viral cap-snatched leaders which we found to contain AUGs (Fig 2D). TISU motifs  
331 are functional within 30 nt of the 5' cap, including at sites at the extreme end of mRNA with  
332 5' UTRs as short as 5 nt [16–18]. As with other upstream translation sites, TISUs have been  
333 proposed to regulate the expression of downstream genes, in response to factors including  
334 energy deprivation and the circadian rhythm [47–49]. As a result sNSVs, being capable of  
335 start-snatching, will necessarily incorporate host regulatory elements into their own mRNAs.  
336 We propose that, in this way, start-snatching may allow sNSVs to modulate their translational  
337 profile in response to the effects that infection is having on their host's gene expression.

338 Our data also show that upstream translation in sNSVs can lead to the expression of novel  
339 viral proteins. We have shown this experimentally for IAV (Fig 2A-C, Fig 3F) and it is clear

340 from genome sequences that the genetic potential to generate proteins from upstream  
341 translation is widespread in IAVs and peribunyaviruses (Fig 3A, B, Supplementary Fig S6  
342 and Supplementary Tables S3, S4). Upstream translation could lead to N-terminal extensions  
343 to canonical proteins, as for the NP-UTR protein we detected in IAV virions (Fig 2 A-C). It  
344 could also lead to the translation of proteins from cryptic overlapping uORFs, which have the  
345 potential to be presented to the adaptive immune system (Fig 3F). While this work was being  
346 completed we became aware of another study, currently in pre-print form, that examined  
347 translation initiation from the cap-snatched sequences of IAV [50]. Consistent with our  
348 results, the authors of this work also report the expression of short uORFs from a number of  
349 IAV genome segments, producing proteins they referred to as Upstream Flu ORFs (UFOs).  
350 Novel viral proteins of this sort share several key features. They would most likely be  
351 expressed at low to moderate levels – certainly lower than most viral proteins, although the  
352 proteins of rapidly-replicating viruses such as IAV are typically expressed at extremely high  
353 levels. Based on our data, this appears to be the case for NP-UTR (Fig 2C). If they overlap a  
354 canonical ORF they will also be short, typically less than 100 codons (Fig 3A, Supplementary  
355 Fig S6). This is shorter than most viral and cellular proteins, though comparable in length to  
356 many short functional ORFs in viral and cellular genomes [33–35,38,51,52]. Finally and,  
357 given their small size and moderate expression levels, perhaps surprisingly, the overlapping  
358 uORFs in segments 1 – 4 of IAV are highly conserved.

359 The conservation of uORFs makes it tempting to suggest that they might encode functional  
360 proteins. However, arguments of this sort must be treated with caution, as other forms of  
361 selection also act on IAV genome sequences. In particular, genome packaging signals in the  
362 primary RNA sequence are concentrated in the terminal regions of each segment [53–55],  
363 resulting in a suppression of synonymous codon usage comparable to that of known  
364 overlapping ORFs (Supplementary Fig S10) [54,56]. One can instead look for suppression of  
365 stop codons in the +1 and +2 frames (reasoning that conservation of primary RNA sequence  
366 should not discriminate specifically against stop codons), but this requires some care as the  
367 occurrence of stop codons in these frames can be affected by codon usage in the main ORF,  
368 as well as by nucleotide and dinucleotide biases [3,57,58]. We attempted to address this by  
369 using randomization to assess the likelihood that the absence of stop codons in any given  
370 region could have arisen through chance alone (Supplementary Fig S10; see Methods for  
371 details). Of the areas where stop codons appeared to be suppressed, the only ones that could  
372 not plausibly be explained by chance alone were the known +1 frame M2 and NEP ORFs and

373 a short +2 frame region near the 5' end of the NS1 ORF (Supplementary Fig S10). Clearly  
374 this is a fairly weak analysis, best suited to identifying long ORFs conserved between highly  
375 divergent sequences. Notably it did not score as significant a number of established  
376 overlapping ORFs, such as the PB1-F2 and PA-X [59,60]. However, this analysis and the  
377 known selection for primary RNA sequence in IAV genome segments mean that the observed  
378 conservation of uORFs is uninformative regarding their functional importance. As a result,  
379 while it is clear that uORFs can be translated, whether there is direct fitness benefit arising  
380 from the proteins they encode must be assessed experimentally on a case-by-case basis.

381 Whether or not the virus makes direct use of uORF proteins, it is clear that the adaptive  
382 immune system can recognise epitopes from within their reading frames (Fig 3F). MHC I  
383 presentation of uORF-derived peptides poses the risk of an adaptive immune response  
384 developing against SNSVs, analogous to the risks posed to IAV by the presentation of  
385 alternative reading frames (ARFs) and defective ribosomal products (DRiPs) [61–65]. Indeed,  
386 the risks posed by the presentation of uORFs are potentially even higher due to the high  
387 conservation of these sequences. They are conserved nonetheless, which suggests that any  
388 cost the virus incurs through their visibility to the immune system is outweighed by the  
389 fitness benefits of maintaining this genetic architecture.

390 In summary, we have shown that SNSVs can expand their genetic repertoire through a  
391 widespread capability for upstream translation initiation. Like all viruses, SNSVs rely on their  
392 hosts for the translation of their genes, and by utilising their host's mechanisms of upstream  
393 translation this diverse group of viruses have gained the ability to develop additional layers of  
394 gene regulation and to potentially encode further gene products in their highly constrained,  
395 short RNA genomes.

## 396 **Materials and Methods**

### 397 **Cells and viruses**

398 Madin–Darby Canine Kidney (MDCK) cells, A549 human lung epithelial cells, and 293T  
399 human embryonic kidney cells were cultured in Dulbecco's Modified Eagle's Medium  
400 (DMEM; Gibco) supplemented with 10% foetal bovine serum (FBS; Gibco). Madin-Darby  
401 Bovine Kidney (MDBK) cells were cultured in Minimum Essential Medium (MEM; Sigma)  
402 supplemented with 2 mM L-glutamine and 10% foetal calf serum (FCS). BSR-T7/5 golden  
403 hamster cells were cultured in Glasgow Minimal Essential Medium (GMEM) supplemented

404 with 10% FCS and 10% tryptose phosphate broth under G418 selection. All cells were  
405 maintained at 37°C and 5% CO<sub>2</sub>.

406 The influenza A viruses A/Puerto Rico/8/34(H1N1) (PR8) and mouse-adapted  
407 A/California/04/09(H1N1) (maCa04) were generated by reverse genetics and propagated on  
408 MDCK cells, as described previously [66]. The influenza virus A/WSN/33(H1N1)  
409 (WSN) was propagated on MDBK cells and the influenza virus A/Udorn/72(H3N2) (Udorn)  
410 was propagated on MDCK cells, as described previously [22,67]. IAVs, with the exception of  
411 WSN, were propagated in the presence of 1 µg/ml TPCK-trypsin. Plaque assays were carried  
412 out in MDCK cells and visualised by immunocytochemistry, as previously described [68].

### 413 Plasmids

414 Plasmids used for IAV minireplicon assays were the firefly-luciferase-encoding phPOLI-NS-  
415 Luc [69]; the viral-gene-encoding pcDNA-PB1, pcDNA-PB2, pcDNA-PA, pcDNA-NP (a  
416 kind gift of Prof Ervin Fodor, University of Oxford) [31]; the Renilla-luciferase-encoding  
417 control plasmid pRL-TK (Promega) and empty vector pcDNA3A. Plasmids used for HRTV  
418 minireplicon assays were the Renilla-luciferase-encoding pT7HRTM<sup>Ren(-)</sup>; the viral-gene-  
419 encoding pTMHRTN and pTMHRTL and the firefly-luciferase-encoding control plasmid  
420 pTM1-FFluc [70]. Plasmids used for OROV minireplicon assays were the Renilla-luciferase-  
421 encoding pTVT7-OROMh<sup>Ren(-)</sup>; the viral-gene-encoding pTM1-ORO-N and pTM1-ORO-L;  
422 the firefly-luciferase-encoding control plasmid pTM1-FFluc and the empty vector pTM1 [71].  
423 For pcDNA IAV reporter assays, the NS-Luc sequence from phPOLI-NS-Luc was cloned  
424 into pcDNA to create pcDNA-NS-Luc. The 5' UTR sequence of this plasmid was edited by  
425 site directed mutagenesis to produce pcDNA-PB2-Luc and pcDNA-NP-Luc. Plasmids used  
426 for reverse genetics were the PR8 pDUAL plasmids (a kind gift of Prof Ron Fouchier,  
427 Erasmus MC) [72] and the maCa04 pDP2002 plasmids (a kind gift of Prof Daniel R. Perez  
428 (University of Georgia, USA) [73]. Site-directed mutagenesis of plasmids was performed  
429 using the Q5 site-directed mutagenesis kit (Qiagen); the edited NS segment sequence  
430 required for the PR8-NS.F3.SIIN mutant virus (described in Supplementary Fig S9A)  
431 synthesised by Genewiz.

### 432 Minireplicon assays and luciferase assays

433 Minireplicon assays were performed as previously described [70,71,74]. Briefly, and using  
434 the plasmids indicated above, for IAV Lipofectamine 2000 (Invitrogen) was used to transfect  
435 sub-confluent 293T cells, and for HRTV and OROV LT-1 transfection reagent (Mirus) was



436 used to transfect sub-confluent BSR-T7/5 cells. To measure luciferase expression from  
437 pcDNA constructs, Lipofectamine 2000 (Invitrogen) was used to transfect sub-confluent  
438 293T cells with the plasmids indicated above. In all cases, after 24 h cells were processed  
439 using a Dual-Luciferase Reporter Assay System (Promega), with luciferase measured using  
440 Glowmax 20/20 luminometer (Promega).

#### 441 Ribo-Seq analysis

442 A549 cells were grown on 100-mm dishes to 90% confluency and infected with PR8 at a  
443 multiplicity of infection (MOI) of 5. At 5 h p.i., cells were rinsed with 5 ml of ice-cold PBS,  
444 flash frozen in a dry ice/ethanol bath and lysed with 400  $\mu$ l of lysis buffer [20 mM Tris-HCl  
445 pH 7.5, 150 mM NaCl, 5 mM MgCl<sub>2</sub>, 1 mM DTT, 1% Triton X-100, 100  $\mu$ g/ml  
446 cycloheximide and 25 U/ml TURBO DNase (Life Technologies)]. The cells were scraped  
447 extensively to ensure lysis, collected and triturated ten times with a 26-G needle. Cell lysates  
448 were clarified by centrifugation at 13,000 g for 20 min at 4°C. Lysates were subjected to  
449 Ribo-Seq based on previously reported protocols [46,75,76]. Ribosomal RNA was removed  
450 using Ribo-Zero Gold rRNA removal kit (Illumina) and library amplicons were constructed  
451 using a small RNA cloning strategy adapted to Illumina smallRNA v2 to allow multiplexing.  
452 Amplicon libraries were deep sequenced using an Illumina NextSeq500 platform  
453 (Department of Biochemistry, University of Cambridge). Ribo-Seq sequencing data have  
454 been deposited in ArrayExpress (<http://www.ebi.ac.uk/arrayexpress>) under the accession  
455 number E-MTAB-8405.

456 For the Ribo-Seq computational analysis, adaptor sequences were trimmed from Ribo-Seq  
457 reads using the FASTX-Toolkit ([hannonlab.cshl.edu/fastx\\_toolkit/](http://hannonlab.cshl.edu/fastx_toolkit/)) and reads shorter than 25  
458 nt following adaptor trimming were discarded. Trimmed reads were mapped sequentially the  
459 genomes of the (*Homo sapiens*) and virus (PR8, with accession numbers EF467817,  
460 EF467818, EF467819, EF467820, EF467821, EF467822, EF467823 and EF467824) using  
461 bowtie version 1 [8], with parameters -v 2 --best (i.e. maximum 2 mismatches, report best  
462 match). Mapping was performed in the following order: host rRNA, virus RNA, host RefSeq  
463 mRNA, host non-coding RNA and host genome. The host databases used were rRNA:  
464 NR\_003287.2, NR\_023379.1, NR\_003285.2, NR\_003286.2; mRNA: 35809 human mRNA  
465 National Center for Biotechnology Information (NCBI) RefSeqs, downloaded 24 Jan 2013;  
466 ncRNA: Ensembl Homo\_sapiens.GRCh37.64.ncrna.fa; genome: UCSC hg19.



467 To account for different library sizes, reads per million mapped reads (RPM) values were  
468 calculated using the sum of both positive-sense host mRNA reads and virus RNA reads as the  
469 denominator. For viral genome coverage plots, and for meta-analyses of host mRNA  
470 coverage, mapping positions were obtained from the 5' end of RPFs plus a 12-nt offset, so as  
471 to approximate the location of the ribosomal P-site. Length distributions of RPFs were  
472 obtained from reads that mapped entirely within host coding regions. Histograms of RPF  
473 positions relative to host mRNA initiation and termination codons were derived from reads  
474 mapping to mRNAs with annotated coding regions  $\geq 450$  nt in length and with annotated  
475 UTRs  $\geq 60$  nt in length (Supplementary Fig S1B). These RPFs were also used to determine  
476 the relative read densities in host 5'UTRs and coding sequences; in this case only reads with  
477 estimated P-sites mapping within the 3'-most 60 nt of the 5' UTR and the 5'-most 450 nt of  
478 the coding region were counted.

479 To quantify RPFs that spanned the junction between virus-derived and host-derived (i.e. cap-  
480 snatched fragment) sequence, reads containing the conserved motif GC[AG]AAAGCA (i.e.  
481 nt 2 – 10 of virus genome segments), and with at least 7 nt of sequence 3' of this motif, were  
482 identified within the set of previously unmapped reads. If the 5' end of this 3' region could be  
483 mapped unambiguously to a virus segment (from nt 11 onwards), then the read was  
484 considered to have been derived from that segment. This enabled extension of the RPF  
485 estimated-P-site density plots on virus mRNAs as far 5' as nt 2 of each segment, since a 28-nt  
486 RPF with P-site mapping to nt 2 – 4 would normally have a 3' end mapping to approximately  
487 nt 17.

## 488 [Mass spectrometry](#)

489 The purification of influenza virions and collection of mass spectra by LC-MS/MS has been  
490 described previously [67], and followed previously-described protocols for purification, mass  
491 spectrometry and data analysis [77]. Briefly, the IAV WSN was propagated on MDBK cells.  
492 Six viral stocks were prepared, of which half were subjected to haemadsorption on chicken  
493 red blood cells to stringently remove non-viral material. Virus particles were then purified by  
494 sucrose gradient ultracentrifugation, lysed in urea, reduced, alkylated and digested with  
495 trypsin and LysC. Tryptic peptides were analysed by liquid chromatography and tandem  
496 mass spectrometry (LC-MS/MS) using an Ultimate 3000 RSLCnano HPLC system (Dionex,  
497 Camberley, UK) run in direct injection mode and coupled to a Q Exactive mass spectrometer  
498 (Thermo Electron, Hemel Hempstead, UK) in 'Top 10' data-dependent acquisition mode.  
499 Raw files describing these mass spectra have been deposited at the Mass spectrometry

500 Interactive Virtual Environment (MassIVE; Center for Computational Mass Spectrometry at  
501 University of California, San Diego) and can be accessed at  
502 <http://massive.ucsd.edu/ProteoSAFe/datasets.jsp> using the MassIVE ID MSV000078740. For  
503 the purposes of this project, data were re-analysed using MaxQuant 1.5.8.3 analysis software  
504 [78] using standard settings and the following parameters: label-free quantitation and the  
505 iBAQ algorithm [79] enabled; enzyme: trypsin/P; variable modifications: oxidation (M) and  
506 acetyl (Protein N-ter); and fixed modifications: carbamidomethyl (C); digestion mode: semi-  
507 specific free N-terminus. Peptide spectra were matched to custom databases containing the  
508 WSN proteome (including full-length translations of all six reading frames), an edited version  
509 of the *Bos taurus* proteome (UP000009136; retrieved from UniProt on 16/05/2017) in which  
510 all instances of the ubiquitin sequence had been deleted, and a single repeat of the ubiquitin  
511 protein sequence.

### 512 [Sequencing of cap-snatched leader sequences](#)

513 The sequencing of cap-snatched leader sequences was described in detail in a recent pre-print  
514 [22]. Briefly, primary CD14+ human monocytes were isolated from 4 volunteer donors under  
515 ethical approval from Lothian Research Ethics Committee (11/AL/0168) and cultured in the  
516 presence of 100 ng/ml (104 U/ml) recombinant human colony-stimulating factor 1 (a gift  
517 from Chiron, USA) for 8 days to differentiate them into macrophages. Monocyte-derived  
518 macrophages were then infected with influenza (Udorn) at an MOI of 5, harvested at 0, 2, 7  
519 and 24 hours post-infection (times defined as starting after a 1h adsorption step), and  
520 processed for RNA extraction using a miRNeasy Mini Kit (Qiagen). Cap analysis of gene  
521 expression (CAGE) was performed as part of the FANTOM5 project, following the  
522 procedure of [80]. Data were processed as in [81] using custom Python scripts available at  
523 [https://github.com/baillielab/influenza\\_cage](https://github.com/baillielab/influenza_cage) 'ATG analysis'. The datasets analysed during  
524 the current study are available in the Fantom5 repository, <http://fantom.gsc.riken.jp/5/data/>

### 525 [Influenza A virus frame 3 conservation analysis](#)

526 Full-length sequences for influenza A virus gene segments 1 (PB2, 42311 sequences), 2 (PB1;  
527 42303 sequences), 3 (PA; 42756 sequences) and 4 (HA; H1 subtype only; 23798 sequences)  
528 were downloaded from the NCBI on 30/08/2019. Nucleotide multiple sequence alignments  
529 (MSAs) were created and clipped 450 nt downstream of the first AUG codon. All sequences  
530 were translated and frame 3 (+2) sequences were extracted; each frame 3 sequence was  
531 clipped after its first stop codon. Clipped frame 3 protein sequences were aligned by MAFFT  
532 using default parameters [82], with spurious or poorly aligned reads removed using trimAl,

533 using parameters -resoverlap 0.70 -seqoverlap 75. Codon usage tables were compiled using  
534 BioEdit.

### 535 **Peribunyavirus uORF analysis**

536 Representative reference sequences were downloaded from the NCBI in September 2018 for  
537 all species in the family *Peribunyaviridae*, as defined by the International Committee for  
538 Taxonomy of Viruses (ICTV). All available segments for each species were downloaded and  
539 examined. For each segment, we recorded the start and stop coordinates of the major ORF.  
540 To examine the coding potential of these sequences, we used custom scripts to virtually  
541 translate reference sequences in all three frames and identify regions of uninterrupted coding  
542 sequence that begin upstream of the start codon of the major ORF, which are not preceded by  
543 an in-frame stop codon. All scripts and data used in this analysis are openly available in an  
544 online repository (<https://giffordlabcvr.github.io/Peribunyaviridae-GLUE/>).

### 545 **Mouse pathogenesis studies**

546 Six-week-old female BALB/c mice were anaesthetised with isofluorane before intranasal  
547 inoculation with 1000 PFU of each influenza virus (n=5). The animals were monitored daily  
548 for body weight changes and survival for 14 days after virus challenge. For ethical reasons,  
549 mice presenting  $\geq 25\%$  body weight loss were humanely euthanized. All procedures that  
550 required the use of animals performed in Portugal were approved by the Instituto Gulbenkian  
551 de Ciência Ethics Committee and the Animal Welfare Body, as well as by the Portuguese  
552 Authority for Animal Health, Direção Geral de Alimentação e Veterinária (DGAV).

### 553 **OTI T cell activation assay**

554 IAV antigen was propagated by infecting MDCK cells with IAV PR8 wild type, PR8  
555 containing an NS segment with SIINFEKL inserted into frame 3 (PR8-NS.F3.SIIN) or PR8  
556 containing an NA segment with SIINFEKL inserted into frame 1 (PR8-NA.SIIN [37]). The  
557 IAV antigen preparations were prepared as described [83,84]. Briefly, MDCK cells were  
558 infected for 48 h with each IAV strain and then centrifuged, resuspended in 0.1 M glycine  
559 buffer containing 0.9% NaCl (pH 9.75), and shaken at 4°C for 20 min. Preparations were  
560 sonicated 4 times at 10 s intervals before centrifugation, and the supernatant stored at -80°C.  
561 Bone marrow was taken from 10-14 week old naïve female C57BL/6 mice, purchased from  
562 Envigo (UK) and maintained at the University of Glasgow under standard animal husbandry  
563 conditions in accordance with UK home office regulations and approved by the local ethics  
564 committee. Bone marrow derived dendritic cells (BMDCs) were prepared as previously

565 described [84] and incubated overnight with IAV antigen preparations. Control BMDCs were  
566 incubated with SIINFEKL peptide (Ovalbumin (257-264), chicken, Sigma-Aldrich) for 1 h at  
567 37°C.

568 OTI mice [85] were bred in-house on a mixed genetic background. Animals were kept in  
569 dedicated barriered facilities, proactive in environmental enrichment under the EU Directive  
570 2010 and Animal (Scientific Procedures) Act (UK Home Office licence number 70/8645)  
571 with ethical review approval (University of Glasgow). Animals were cared for by trained and  
572 licensed individuals and humanely sacrificed using Schedule 1 methods. Lymph nodes (LN)  
573 (inguinal, brachial, axillary and cervical) and spleen were obtained from OTI mice sacrificed  
574 at weeks 12-13. CD8 T cells were negatively selected from LN and spleen using EasySep™  
575 Mouse CD8+ T Cell Isolation Kit (Stemcell technologies).

576 BMDCs that had been exposed to viral antigen were co-cultured with CD8+ OTI T cells for  
577 24 h. Activated T cells were detected by immunostaining with antibodies against Va2-E450  
578 (Thermo Fisher), Vb5-PE (M59-4 BD Biosciences), CD8-Alexaflor488 (53-6.7 Thermo  
579 Fisher), CD25-APC (PC61.3 Thermo Fisher), CD44-PerCpC5.5 (IM7 Thermo Fisher), and  
580 CD69-PerCy7 (H1.2F3 Thermo Fisher). Data were acquired with a BD Fortessa cell analyser  
581 and analysed by FlowJo (BD, version 10).

## 582 [Analysis of stop codon suppression in influenza A viruses](#)

583 All influenza A virus nucleotide sequences were downloaded from the NCBI on 28 July 2019.  
584 Patent sequence records, sequences with NCBI keywords “UNVERIFIED”,  
585 “STANDARD\_DRAFT” or “VIRUS\_LOW\_COVERAGE”, and sequences with any  
586 ambiguous nucleotide codes (e.g. “N”s) were removed. leaving 109,132 sequences.  
587 Sequences were sorted into the eight segments using tblastn [86] with PR8-strain peptide  
588 sequences as queries.

589 For the three-frame stop codon plots, a set of “representative” sequences for each segment  
590 was obtained using BLASTCLUST (a single-linkage BLAST-based clustering algorithm;  
591 [86]) to cluster closely related sequences. One representative sequence from each cluster was  
592 selected. A disadvantage of this approach is that defective sequences (from defective viruses  
593 or from poor quality sequencing or misassembly) tend to form their own clusters and so  
594 become over-represented in the set of “representative” sequences. To guard against such  
595 problems, we used a number of restrictive selection criteria (see below). In segments 7 and 8,  
596 we first inserted “NN” immediately 5'-adjacent to the splice acceptor site in all sequences to

597 fuse the coding regions of M2 and M1, and of NEP and NS1. We then identified the longest  
598 AUG-to-stop-codon open reading frame (ORF) in every sequence. We found the modal ORF  
599 length for each segment and discarded all sequences where the ORF was not of the modal  
600 length. This resulted in the loss of ~37%, ~25% and ~15% of segment 4, 5 and 6 sequences,  
601 respectively, and <2% of sequences for other segments. For each segment, we then  
602 constructed the consensus amino acid sequence for the longest ORF and discarded all  
603 sequences which did not have a gap-free longest ORF amino acid alignment to the consensus.  
604 In this step, pairwise sequence alignments were performed with MUSCLE [87]. This step  
605 removed ~43% of segment 4 sequences and ~40% of segment 6 sequences, but only 1 other  
606 sequence among the other segments. All remaining sequences had >73% longest-ORF amino  
607 acid identity to the respective consensus sequence.

608 For each segment, we then clustered the longest-ORF amino acid sequences with  
609 BLASTCLUST (parameters -p T, -L 1, -b T). We applied BLASTCLUST with different  
610 amino acid identity thresholds (-S parameter) starting from 99.9% and stepping downwards  
611 in decrements of 0.1% until the number of clusters was 50 or fewer. We then excluded all  
612 clusters with just a single sequence. For each segment, we then chose the lowest  
613 BLASTCLUST identity threshold that resulted in  $\geq 50$  non-singleton clusters. This resulted in  
614 amino acid identity thresholds of 98.9%, 99.1%, 98.9%, 98.8%, 99.2%, 96.4%, 98.8% and  
615 97.9%, and 58, 51, 50, 57, 64, 52, 56 and 56 non-singleton clusters, for segments 1–8  
616 respectively. To choose a representative sequence for each cluster, we first extracted the  
617 nucleotide sequence corresponding to the longest ORF. To mitigate the effect of potential  
618 sequencing errors, in each cluster the representative sequence was chosen to be the sequence  
619 with the most identical copies (with ties broken arbitrarily) or, if there were no duplicated  
620 sequences, the sequence closest to the centroid (the minimum summed pairwise nucleotide  
621 distances from sequence  $i$  to all other sequences  $j$  within the cluster).

622 Since all selected coding-region sequences for each segment were of the same length,  
623 sequence alignment at this stage was trivial. Synonymous site conservation in the coding  
624 region of each segment was analysed using SYNLOT2 [88] using a 25-codon sliding  
625 window and an amino-acid-based phylogenetic guide tree estimated using PhyML [89] with  
626 default parameters. Due to insertion of “NN” immediately 5'-adjacent to the splice acceptor  
627 site in segments 7 and 8 (see above), the synonymous site conservation analysis in the dual  
628 coding regions is for the M2 and NEP reading frames, respectively. To produce three-frame  
629 stop codon plots within the coding regions of each segment, the “NN”s were removed from

630 the segment 7 and 8 sequences, and the positions of +0, +1 and +2 frame stop codons were  
631 determined in each sequence of each alignment and plotted.

632 Within the sequence alignments, the statistical significance of conserved open reading frames  
633 – defined as an alignment-wide absence of stop codons in a given region – was analysed for  
634 all such regions in the +1 or +2 frames that were greater than 20 codons in length. Statistical  
635 significance was evaluated by randomly shuffling zero-frame codon columns within each  
636 region and calculating the fraction of shuffled alignments that preserved an ORF in the  
637 alternative frame. 4,000 random shufflings were performed for each region. This procedure  
638 controlled for any bias for or against random long ORFs in the alternative frame that might  
639 have resulted from zero-frame amino acid use, codon use, or nucleotide biases, and also  
640 controls for phylogenetic non-independence of the aligned sequences. Four ORFs were  
641 detected with  $p < 0.05$  and, for these, the number of shufflings was increased to 100,000.  
642 These regions were: segment 2, frame +2, nt 3–77,  $p = 0.0062$ ; segment 7, frame +1, nt 689–  
643 979,  $p = 0.00017$  (M2); segment 8, frame +1, nt 473–835,  $p = 0.00000$  (NEP); and segment 8,  
644 frame +2, nt 12–83,  $p = 0.00085$ ; where in all cases nt 1 corresponds to the first nucleotide of  
645 the main ORF (M1 and NS1, respectively, for segments 7 and 8), and the  $p$ -value is the  
646 proportion of 100,000 randomizations that have no stop codons in the given frame and  
647 region. Two of these regions are the parts of M2 and NEP that are downstream of a slice site  
648 (as indicated). The alignments contain a total of 30 regions that are  $> 20$  codons and have no  
649 stop codons in the +1 or +2 frames. Therefore, to account for multiple testing the threshold  
650 for a 0.05 probability of a false positive was  $0.05/30 = 0.00167$ , a threshold which is  
651 surpassed only by the M2 and NEP ORFs and by nt 12–83 of segment 8.

652



653 **Figures**

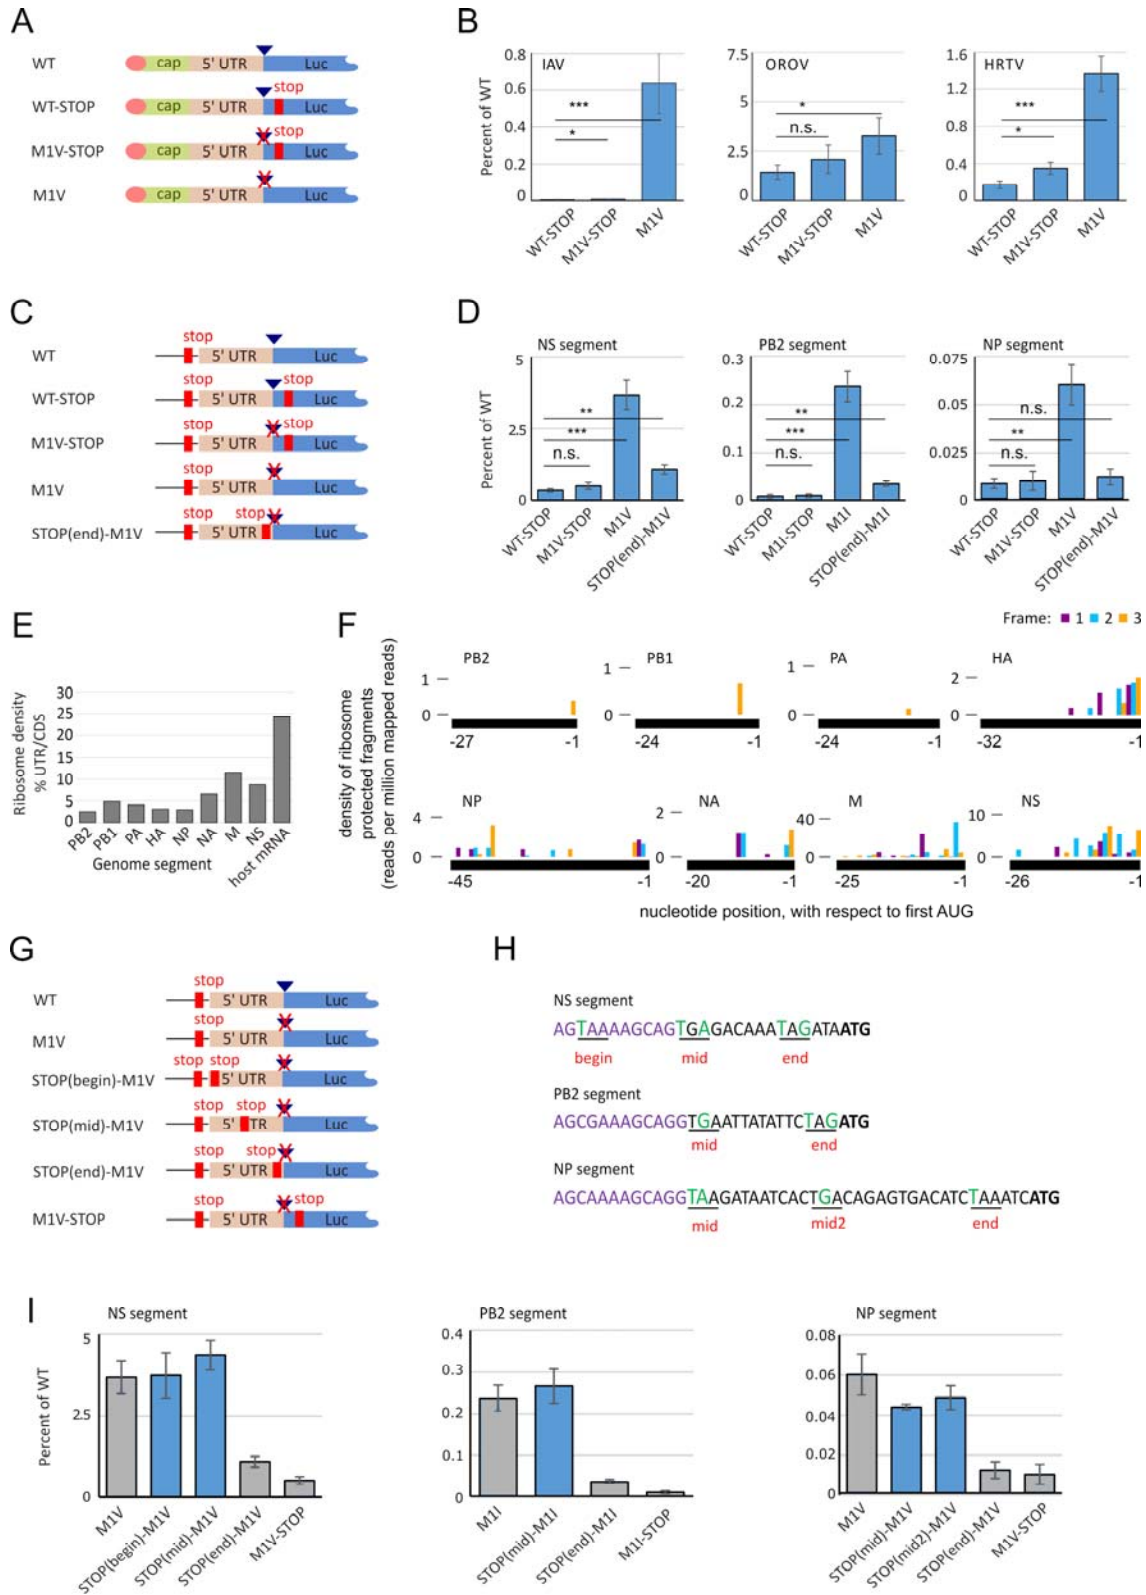

654



655 **Figure 1: Upstream Translation Initiation in the 5' Untranslated Regions of Segmented**  
656 **Negative-Strand RNA Viruses.** (A) Schematic showing (in coding sense) the 5' termini of  
657 viral reporter RNAs, in which a viral untranslated region (UTR) flanks a luciferase (Luc)  
658 reporter gene. Reporter RNAs were used to assess upstream translation in the mRNAs of  
659 influenza A virus (IAV), Heartland virus (HRTV) and Oropouche virus (OROV). The 5'  
660 terminus of the mRNAs consisted of cap-snatched sequence from host mRNAs (cap),  
661 followed by a viral 5' UTR (5' UTR) and the reporter gene (Luc). Cap structures are indicated  
662 as circles, the most N-terminal AUG as a triangle, AUG mutations as crosses and stop codons  
663 as lines. (B) Luc expression when these reporters were included in minireplicon assays, as a  
664 percentage of expression with the WT construct, showing the means and s.d. of 5 (IAV), 3  
665 (HRTV) or 4 (OROV) repeats compared to WT-STOP by Student's 2-tailed t-test (n.s.:  $p \geq$   
666 0.05, \*  $p < 0.05$ , \*\*\*  $p \leq 0.0005$ ). (C) 5' viral UTRs and Luc reporter genes were inserted, in  
667 coding sense, into a cellular RNA Polymerase II (RNAPII) transcribed plasmid in order to  
668 assess upstream translation of IAV segments 1, 5 and 8. A schematic showing mutations in  
669 the UTR region is shown. (D) Luc expression when these reporters were transcribed by  
670 RNAPII, as a percentage of WT. Means and s.d. of 3 repeats; compared to WT-STOP by  
671 Student's 2-tailed t-test. (n.s.:  $p \geq 0.05$ , \*  $p < 0.05$ , \*\*  $p < 0.005$ , \*\*\*  $p \leq 0.0005$ ). (E)  
672 Summary Ribo-Seq measurements of viral and host mRNA from IAV infected cells, showing  
673 the ribosome density on 5' UTRs as a percentage of its density on the main coding sequence  
674 (CDS). (F) Ribo-Seq profiles of the virally-encoded 5' UTRs (black lines), with histograms  
675 showing the frequency of ribosomal P-site positions, inferred from the density of ribosome-  
676 protected fragments. Reads in frame with, +1 to, or +2 to the main ORF are shown in purple,  
677 blue and yellow, respectively. Ribo-Seq profiles of the canonical CDSs are shown in  
678 Supplementary Figure S1. (G) Schematic showing expression constructs, as in (C), modified  
679 to include additional stop codons to map upstream translation in IAV segments 1, 5 and 8. (H)  
680 5' UTR sequences of IAV segments 1, 5 and 8 showing the conserved sequence (purple),  
681 segment-specific sequences (black) and stop mutations (green) and stop codons (underlined).  
682 (I) Luc expression when these reporters were transcribed by cellular RNAPII, as a percentage  
683 of WT. The means and s.d. of 3 repeats are shown, with grey bars indicating data also  
684 included in panel (D).

685

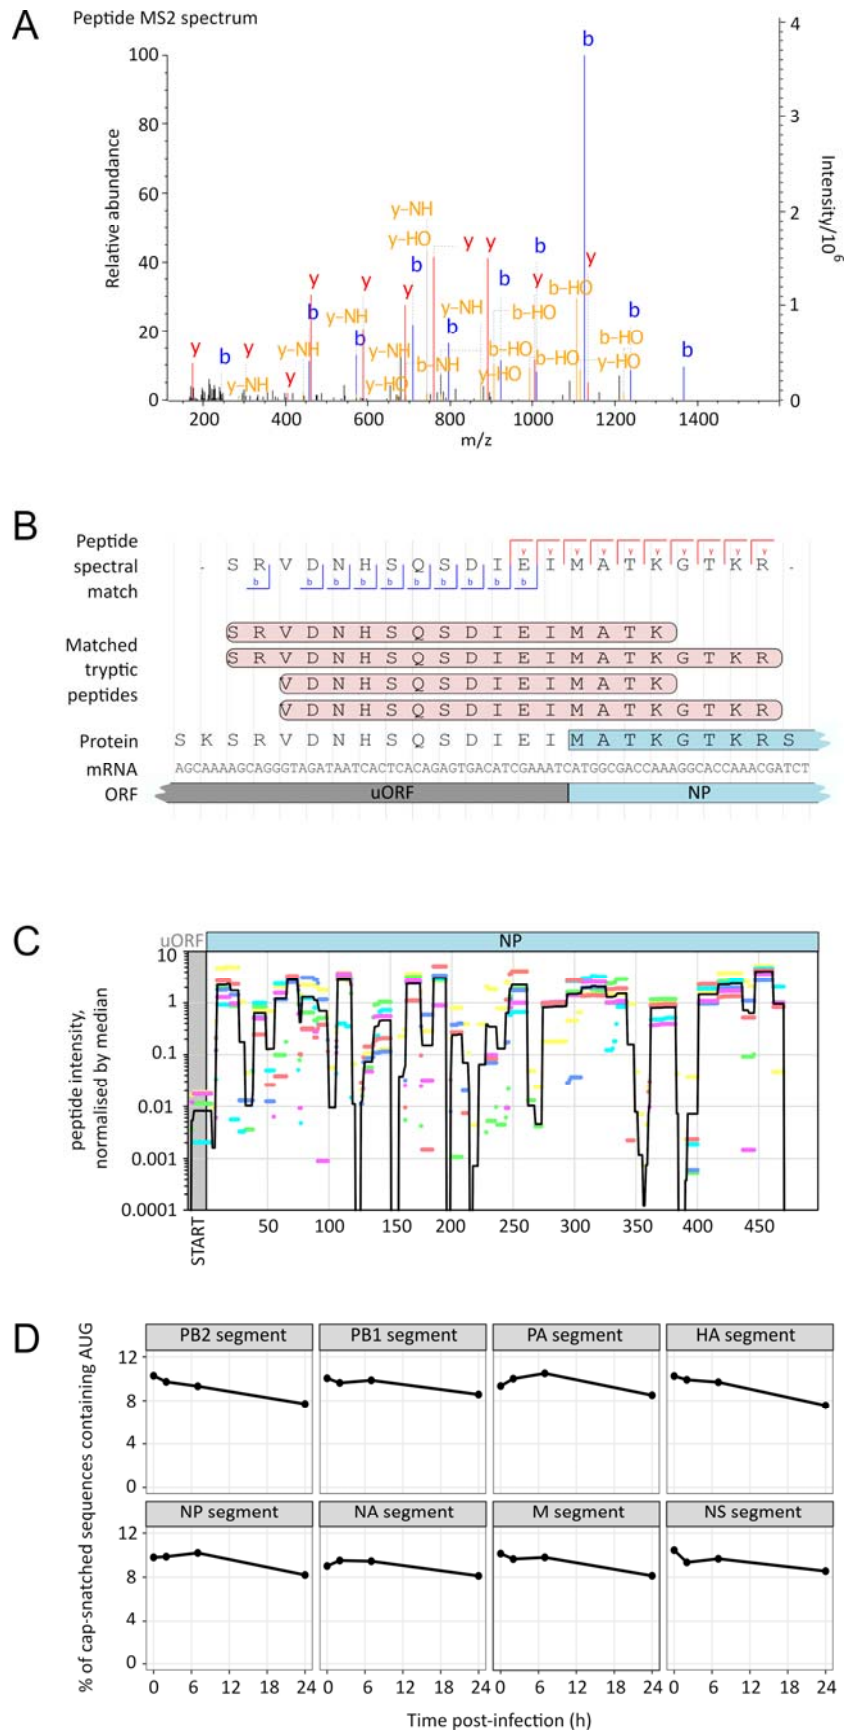

687 **Figure 2: Upstream Translation Initiation of Virally-Encoded UTRs.** (A) – (C) IAV  
688 particles were purified and subjected to tryptic digest, liquid chromatography and tandem  
689 mass spectrometry. (A) A representative fragment mass spectrum (MS2) describing a tryptic  
690 peptide mapping to the 5' UTR of IAV segment 5 (NP). (B) Interpretation of this mass  
691 spectrum, comparison of its sequence to other, overlapping tryptic peptides that were  
692 identified (see Supplementary Fig S2), and comparison of these peptides to the NP gene and  
693 5' UTR of IAV segment 5. (C) The intensities (MS1) with which peptides were detected at  
694 positions spanning the entirety of IAV segment 5. Data from 6 separate experiments (colour-  
695 coded) are shown, normalised to median intensity of peptides mapped to NP and its 5' UTR.  
696 The average intensity mapped to each residue is indicated with a black line and the region  
697 spanning the upstream ORF (uORF) is shaded. (D) Cap Analysis Gene Expression (CAGE)  
698 sequencing of cap-snatched sequences for the eight segments of the IAV genome, collected  
699 from infected cells at various times post-infection and showing the percentage of cap-  
700 snatched sequences containing AUG codons.

701

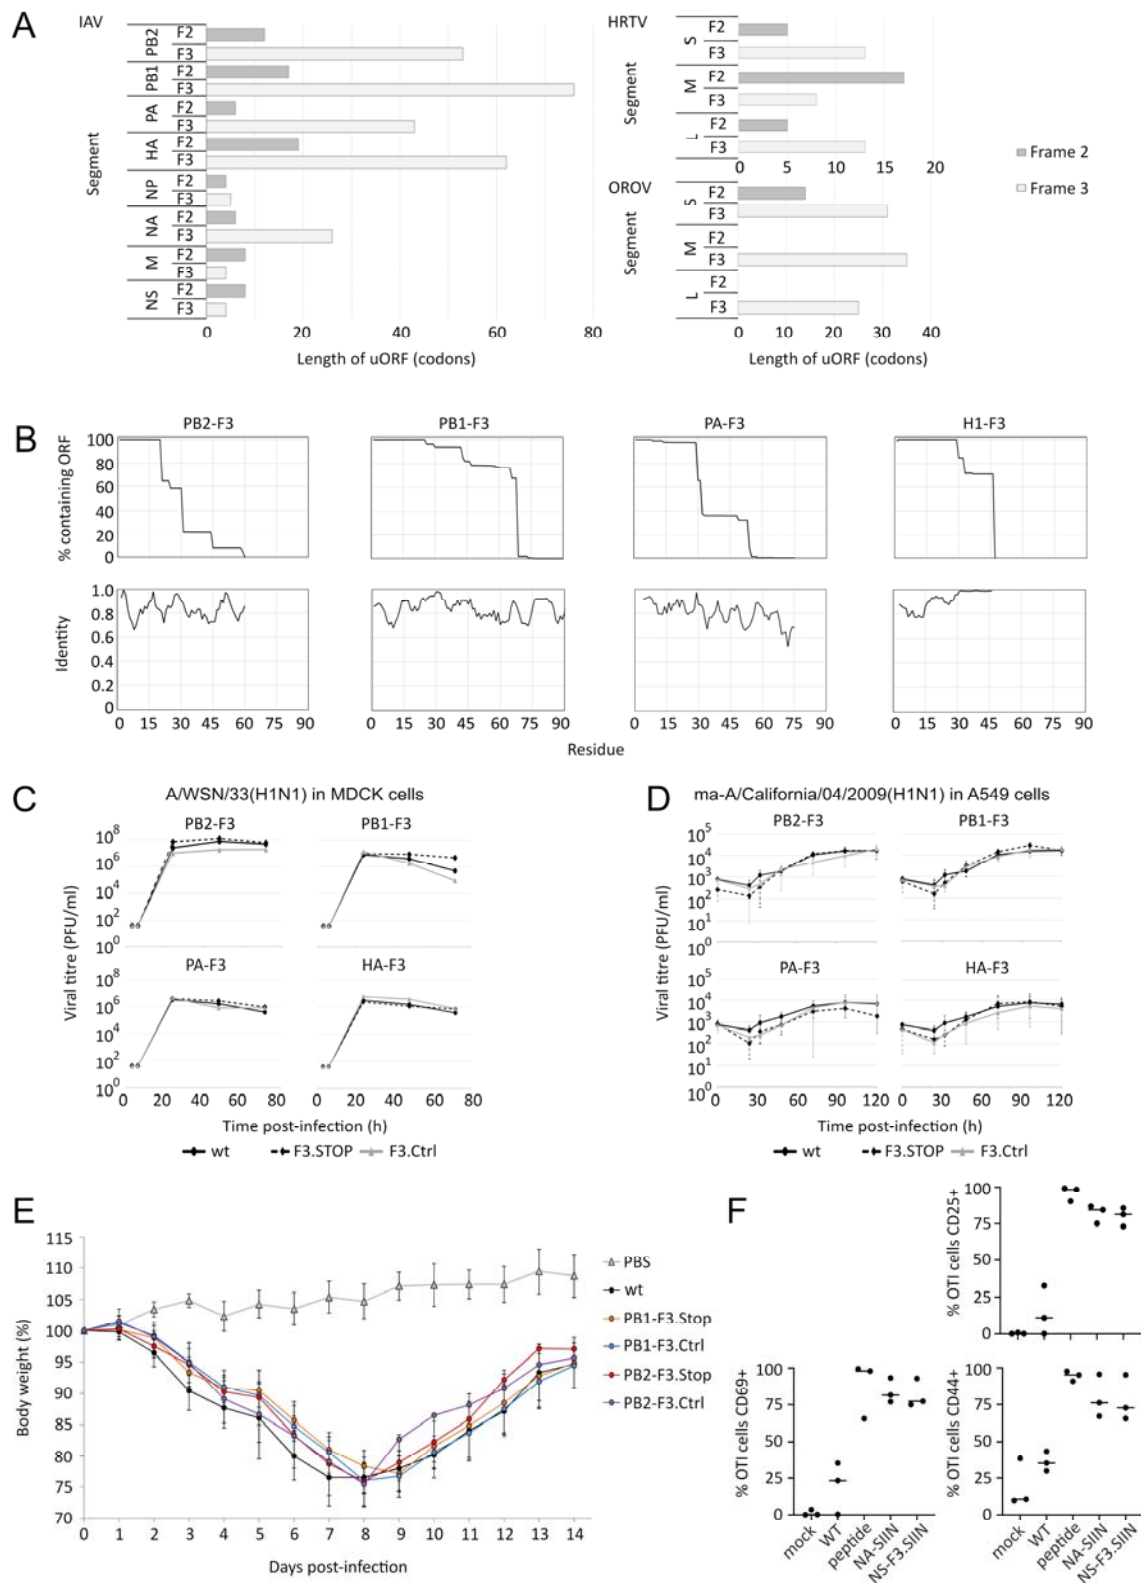

702

703 **Figure 3: Upstream Translation Initiation Can Access Overlapping Viral ORFs.** (A) The

704 length of 5' ORFs in IAV (A/WSN/33; WSN), OROV and HRTV, beginning at the extreme

705 5' end of each segment (coding sense, including the 5' UTR) and continuing in frames 2 and 3  
706 until encountering a stop codon. (B) Comparison of 5' frame 3 (F3) sequences from segments  
707 1 – 4 of >20,000 IAV isolates showing the proportion that do not encounter a stop codon by a  
708 given length (upper) and the degree of identity of the encoded sequences (lower). (C – D)  
709 Viruses containing F3.STOP or synonymous F3.Ctrl mutations within the PB2, PB1, PA and  
710 HA segments were created by reverse genetics. To assess multi-cycle growth kinetics, media  
711 were collected from cells infected at an initial MOI of 0.01 and plaque titres determined on  
712 MDCK cells. Growth kinetics were determined when (C) mutants of the laboratory-adapted  
713 IAV WSN were used to infect MDCK cells and (D) mutants of the near-clinical IAV isolate  
714 mouse adapted-A/California/04/2009(H1N1) (maCa04) were used to infect human lung A549  
715 cells (means and s.d. of 3 experiments). (E) Selected maCa04 viruses were used to infect  
716 BALB/c mice and mouse weight was recorded over time. (F) IAV antigen preparations were  
717 obtained by infecting MDCK cells with WT virus, virus with a SIIN peptide in the stem of  
718 the NA protein (NA.SIIN) or virus with a cryptic SIIN peptide in F3 of segment 8 (NS-  
719 F3.SIIN). Bone marrow derived dendritic cells (BMDCs) were treated overnight with the  
720 IAV antigen preparations and then co-cultured with SIIN-specific OTI T cells. OTI activation  
721 was determined by immunostaining for the T cell activation markers CD25<sup>+</sup>, CD44<sup>HIGH</sup><sup>+</sup> and  
722 CD69<sup>+</sup>. Mock infection and exposure of BMDCs to a purified SIIN peptide were used as  
723 controls. Datapoints and means from 3 experiments are shown.

724

## 725 Supplementary Figures

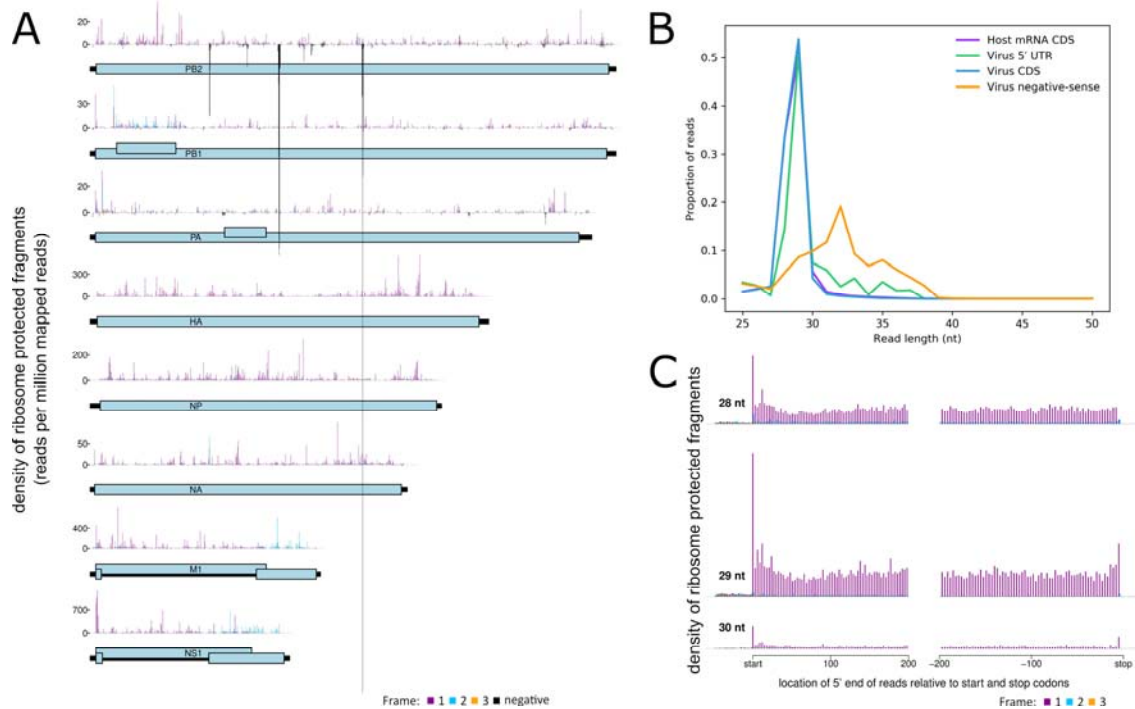

726

727 **Supplementary Figure S1: Ribosome profiling of influenza A virus mRNA.** Human lung  
728 A549 cells were infected with the influenza A virus (IAV) A/Puerto Rico/8/1934(H1N1) at  
729 MOI 5. At 5 h p.i., cells were flash frozen, ribosome profiling (Ribo-Seq) was performed, and  
730 ribosome protected fragments (RPFs) were used to infer the location of ribosome P-sites on  
731 mRNAs, by mapping to the viral genome and host transcriptome. (A) Full Ribo-Seq profiles  
732 of all eight genomic segments of IAV (shown partially in Fig 1F), with pale blue rectangles  
733 indicating the canonical coding sequences and black rectangles indicating the genomic  
734 segments. Histograms show the location of the 5' ends of reads with a +12 nt offset to map  
735 the approximate P-site positions. Reads which map to the first, second and third nucleotides  
736 of codons relative to the reading frame of the main ORF are indicated in purple, blue and  
737 yellow, respectively. Reads mapped to corresponding positions in the negative-sense vRNA  
738 are indicated in black on a negative scale. Within the main ORFs most reads map to the  
739 purple phase, except in the +1 frame M2 and NS2 ORFs, where most reads map to the blue  
740 phase. (B) Read length distributions. In preliminary work we found that IAV Ribo-Seq  
741 libraries were often contaminated by non-RPF-derived RNA which we inferred was derived  
742 from ribonucleoprotein complexes (RNPs) formed when virus nucleoprotein (NP) binds RNA.  
743 RNPs may co-sediment with ribosomes and give rise to additional nuclease-protected RNA  
744 fragments. We have found both viral and host mRNA contamination occurring at later time

745 points of infection, suggesting that RNPs may also form with host mRNAs. High levels of  
746 contamination would make interpreting the low density of non-phased RPFs in the viral 5'  
747 UTRs problematic. The library shown here was specifically chosen as one with relatively low  
748 contamination (assessed by a low density of reads mapping to host mRNA 3' UTRs). To  
749 confirm that the reads observed in the viral 5' UTRs were predominantly *bona fide* ribosome  
750 footprints, we compared their length distribution (green) with those of host mRNA coding  
751 sequence (CDS)-mapping reads (purple) and viral CDS-mapping reads (blue). The very  
752 similar length distributions indicate that the reads we saw mapping to viral 5' UTRs in this  
753 library are mostly *bona fide* RPFs, with only a small fraction of contamination (note the high-  
754 end shoulder in the green distribution). In contrast, reads mapping to the viral genome in the  
755 negative sense orientation were found to have a very different length distribution (orange)  
756 indicating that they are, as expected, not *bona fide* RPFs, consistent with them deriving from  
757 co-sedimenting viral RNPs. (C) Histograms of 28, 29 and 30 nt Ribo-Seq read positions  
758 relative to annotated initiation and termination sites summed over all host mRNAs.  
759 Histograms show the location of the 5' ends of reads with a +12 nt offset to map the  
760 approximate P-site positions. Reads which map to the 1st, 2nd or 3rd nucleotides of codons  
761 are indicated in purple, blue or yellow respectively. The vast majority of reads map to the 1st  
762 nucleotide position of codons. While only a small proportion of reads map to the 5' UTRs,  
763 considerably fewer reads map to the 3' UTRs.  
764



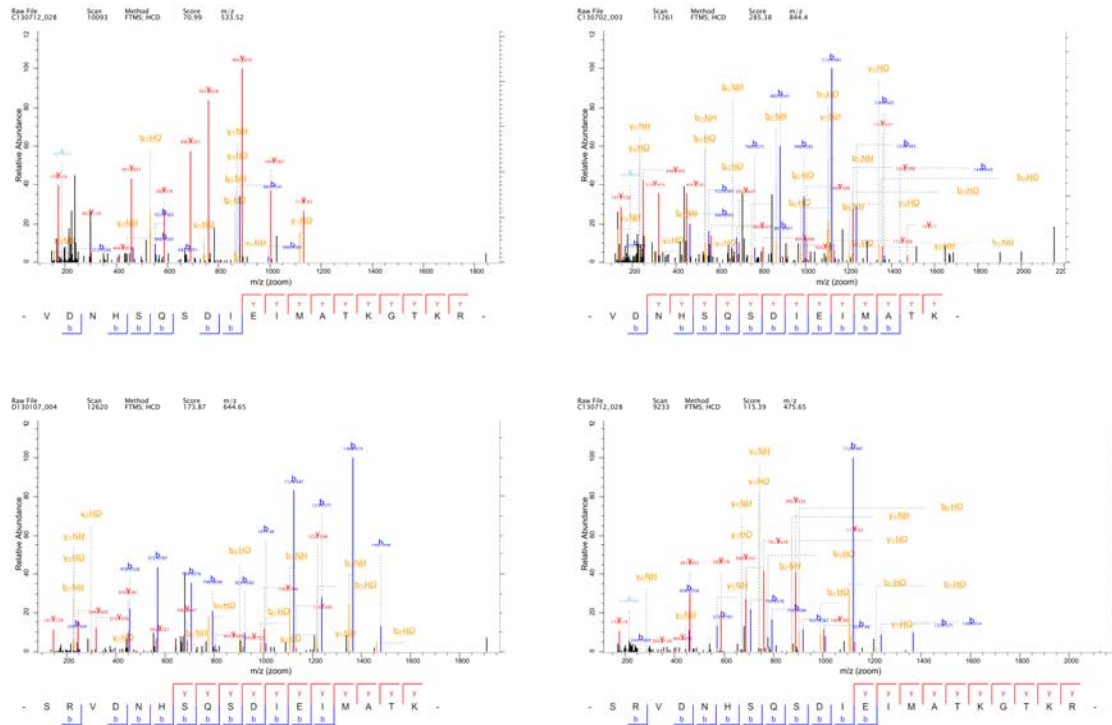

765

766

767 **Supplementary Figure S2: Peptide spectral matches mapping to the 5' UTR of**

768 **Influenza A Virus NP.** IAV A/WSN/33(H1N1) were purified, subjected to tryptic digest and  
 769 analysed by liquid chromatography and tandem mass spectrometry (LC-MS/MS). Annotated  
 770 peptide spectral matches (PSMs) mapping to the 5' UTR of IAV segment 5 (NP) are shown  
 771 (see also Fig 2B and Supplementary Table S1; the canonical NP sequence begins  
 772 'MATKGTKR...'). Four different PSMs are shown, with different numbers of missed tryptic  
 773 cleavage sites (trypsin cleaves C-terminal to K or R except when followed by P).

774

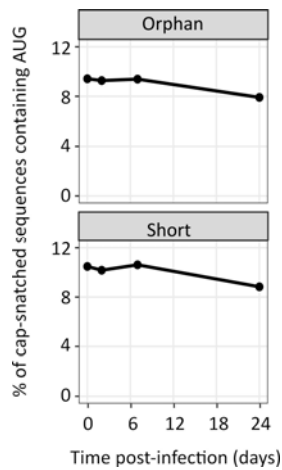

775

776

777 **Supplementary Figure S3: Proportion of unassigned influenza A virus cap-snatched**  
778 **sequences that contain an AUG.** Additional data accompanying Figure 2D. Cap Analysis  
779 Gene Expression (CAGE) sequencing of cap-snatched sequences in the IAV transcriptome,  
780 collected from infected cells at various times post infection and showing the proportion of  
781 cap-snatched sequences containing AUG codons. Figure 2D describes reads that could be  
782 matched unambiguously to transcripts of a particular IAV segment; this figure describes  
783 reads where this was not possible. 'Orphan' reads match 3 or more nt of an IAV segment past  
784 the conserved promoter sequence, but do not align at the appropriate point, potentially due to  
785 sequencing errors or mRNA processing. 'Short' reads contain fewer than 3 nt of influenza  
786 sequence read past the promoter, and so cannot be unambiguously assigned to a specific  
787 genome segment.

788

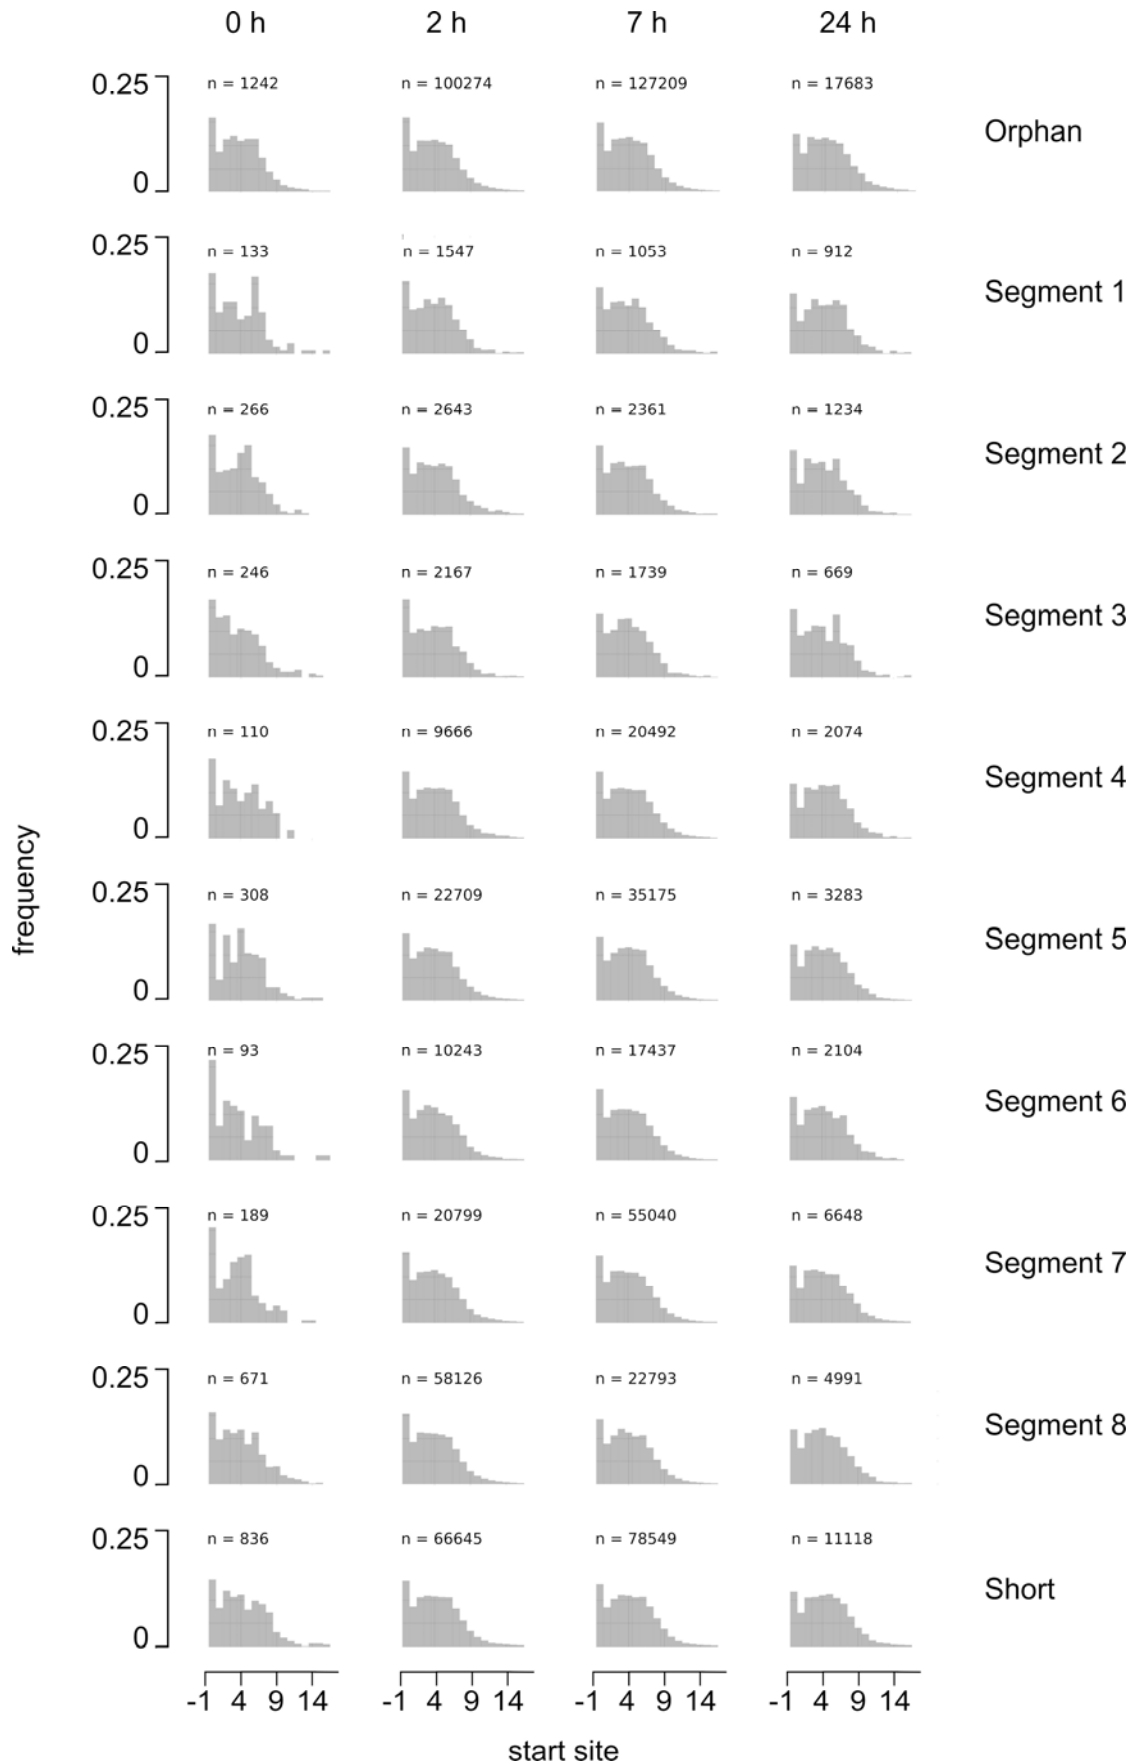

790

791 **Supplementary Figure S4: Position of AUG codons within the 5' termini of mRNA.**

792 Monocyte-derived macrophages were infected with influenza A/Udorn/307/72(H3N2) at a  
793 multiplicity of infection (MOI) of 5 and harvested at 0, 2, 7 and 24 h post-infection. Each  
794 timepoint represents 4 donors. The sequences of viral 5' sequences appropriated from host  
795 mRNAs by cap-snatching were determined by cap analysis of gene expression (CAGE).

796 Where possible, reads were assigned to the viral genome segment from which the mRNA was  
797 transcribed; 'orphan' and 'short' reads are as defined in Supplementary Figure S3. Leader  
798 lengths were capped at 20 nt for analysis. The frequency of AUG codons at different  
799 positions relative to the 5' terminus of the mRNA was expressed as a proportion of the total  
800 number of AUG-containing sequences (the number of which is indicated for each panel).

801 Note that most leader sequences are 10 – 14 nt in length, which results in a depression in  
802 AUG frequencies at more downstream positions.

803

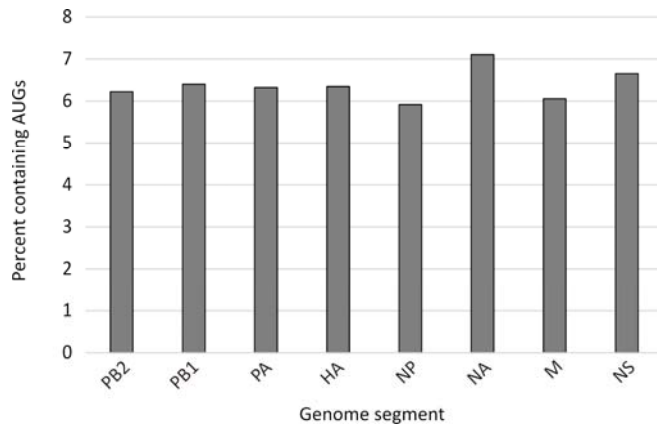

804

805

806 **Supplementary Figure S5: Proportion of previously-reported influenza A virus cap-**

807 **snatched sequences that contain an AUG.** A previously-published deep-sequencing

808 analysis of cap-snatched leader sequences from the influenza A virus A/WSN/33(H1N1)

809 (Koppstein *et al.* (2015) *Nucleic Acids Research* 43(10) 5052-64; doi:10.1093/nar/gkv333)

810 was re-analysed. The percentages of cap-snatched leader sequences from each genome

811 segment that contain AUG codons are shown.

812

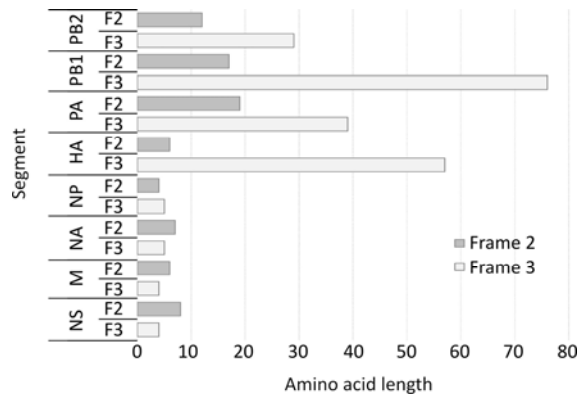

813

814

815 **Supplementary Figure S6: Overlapping uORFs in the influenza A virus maCa04.** The

816 lengths of 5' ORFs that overlap the canonical ORFs (frame 1) of the mouse-adapted influenza

817 A virus ma-A/California/04/2009(H1N1). The lengths shown are the number of codons that

818 can be read from the 5' end of each segment (coding sense, including the 5' UTR) in frames 2

819 and 3 before encountering a stop codon.

820

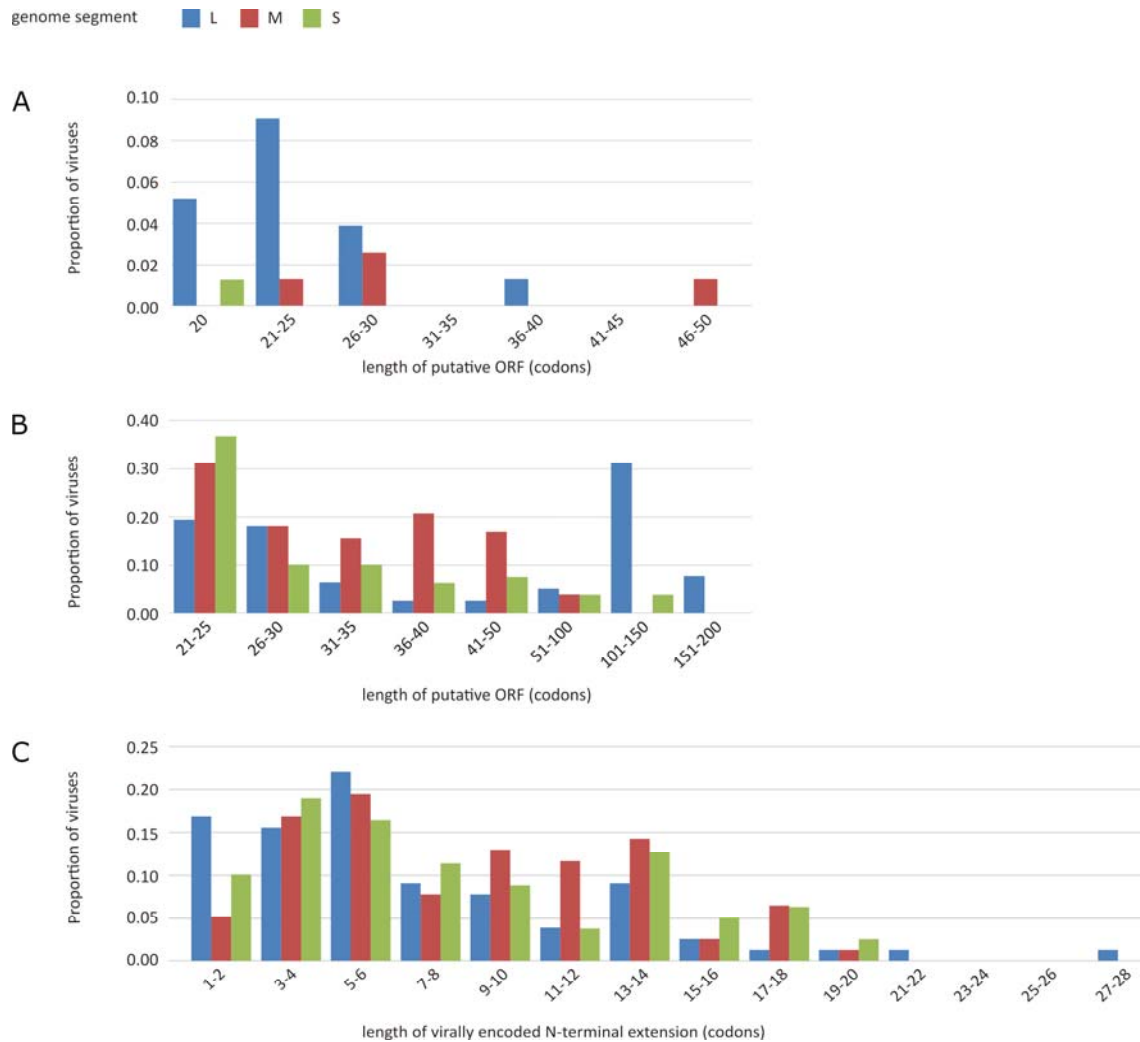

821

822

823 **Supplementary Figure S7: Putative upstream ORFs in peribunyaviruses.** Full-length L,

824 M and S genome segments from 78 different peribunyavirus species were translated in all

825 three forward frames, numbered with respect to the main ORF of that segment. The lengths

826 of putative uORFs are shown, defined as sequences that could be read from within the 5'

827 UTR of a segment (**A**) in any frame, continuing for more than 20 codons before encountering

828 a stop codon upstream of the canonical ORF; (**B**) in frames +1 and +2 with respect to the

829 canonical ORF, overlapping the canonical ORF and continuing for more than 20 codons

830 before encountering a stop codon; and (**C**) in frame with the canonical ORF and encoding a

831 potential N-terminal fusion to that ORF, of any length.

832



A

Ctrl: C  
Stop: T  
PB2 segment wt: ATGGAAAGAAT<sup>A</sup>AAAGAACTAAGGAATCTAATGTCGCAGTCTCGCACTCGCGAG  
Frame 1: M E R I K E L R N L M S Q S R T R E  
Frame 3: G K N K R T K E S N V A V S H S R D

Ctrl: G  
Stop: T  
PB1 segment wt: ATGGATGT<sup>C</sup>AATCCGACTTTACTTTTCTTAAAAGTGCCAGCACAAAATGCTATAAGCA  
Frame 1: M D V N P T L L F L K V P A Q N A I S T  
Frame 3: G C Q S D F T F L K S A S T K C Y K H

Ctrl: A  
Stop: T  
PA segment wt: ATGGAAGATTTTGTGCGACAATGCTTCAATCCGATGATTGT<sup>C</sup>GAGCTTGC<sup>G</sup>AAAAGGC  
Frame 1: M E D F V R Q C F N P M I V E L A E K A  
Frame 3: G R F C A T M L Q S D D C R A C G K G

Ctrl: C  
Stop: T  
HA segment wt: ATGAAGGCTTTTGTACTGGTCTGTATATGCATTTGTAGCTAC<sup>A</sup>GATGCAGACACA  
Frame 1: M K A F V L V L L Y A F V A T D A D T  
Frame 3: E G F C T G P V I C I C S Y R C R H

B

Ctrl: C  
Stop: T  
PB2 segment wt: ATGGAGAGAAT<sup>A</sup>AAAGAACTGAGAGATCTAATGTCGCAGTCCC<sup>G</sup>CACTCGCGAGAT  
Frame 1: M E R I K E L R D L M S Q S R T R E I  
Frame 3: G E N K R T E R S N V A V P H S R D

Ctrl: G  
Stop: T  
PB1 segment wt: ATGGATGT<sup>C</sup>AATCCGACTCTACTTTTCTTAAAATCCAGCGCAAAATGCCATAAGCAC  
Frame 1: M D V N P T L L F L K I P A Q N A I S T  
Frame 3: G C Q S D S T F P K N S S A K C H K H

Ctrl: A  
Stop: T  
PA segment wt: ATGGAAGACTTTTGTGCGACAATGCTTCAATCCAATGATCGT<sup>C</sup>GAGCTTGC<sup>G</sup>AAAAGGA  
Frame 1: M E D F V R Q C F N P M I V E L A E K A  
Frame 3: G R L C A T M L Q S N D R R A C G K G

Ctrl: C  
Stop: T  
HA segment wt: ATGAAGGCAACTAGTAGTTCTGCTATATACATTTGCAACCGCAAAATGCAGACACA  
Frame 1: M K A I L V V L L Y T F A T A N A D T  
Frame 3: E G N T S S S A I Y I C N R K C R H N

833

834

835 **Supplementary Figure S8: Design of frame 3 mutations in influenza A viruses.** Partial  
836 nucleotide and amino acid (frames 1 (canonical ORF) and 3) sequences for the PB2, PB1, PA  
837 and HA segments of influenza A viruses, beginning at the canonical start codon. Annotations

838 at mutated sites indicate WT sequences (underlined) and mutations designed to introduce  
839 frame 3 stop codons ('Stop') or to be conservative in frame 3 ('Ctrl'). All mutations are  
840 synonymous in frame 1. Designs for mutants are shown for **(A)** influenza A/WSN/33(H1N1)  
841 and **(B)** mouse-adapted influenza A/California/04/2009(H1N1).  
842

**A** **CGTCTCTGGGG**  
 AGCAAAAAGCAGGGTGGCAAAGACATA**ATG**GATCCAACACTGTGTCAAGCTTTCAGGTAGATTGCTTCTTTGGCATGTCCGCAAACGAGTTGCAGACC  
 AAGAACTAGGGGATGCCCATTCCTGGATCGGCTTCGCCGAGATCAGAAATCCCTAAGAGGAAGGGGAGCAGCTCTTGGTCTGGACATCGAGACAGCCA  
 CACGTGTCTGGAAAGCAGATAGTGGAGCGGATTCTGAAAGAAGAATCCGACGAGGCACT**CAAAATC**Agat**Cat**caactttgaaaaactg**TC**CTCGCTCGGTTAC  
 CTAACCGACATGACTCTTGAGGAAATGCAAGGGAATGGTCCATGCTCATACCCAAGCAGAAAGTGGCAGGCCCTCTTTGTATCAGAATGGACCAGGGCA  
 TCATGGATAAAAACATCATACTGAAAGCGAACTTCAGTGTGATTTTGACCGCTGGAGACTCTAATATTGCTAAGGGCTTCCACCGAAGAGGGAGCAATT  
 GTTGGCAAATTTACCAATTGCCTTCTTCCAGGACATACTGCTGAGGATGTCAAAAATGCAGTTGGAGTCTCATCGGAGGACTTGAATGGAATGATAA  
 CACAGTTCGAGTCTCTGAAACTCTACAGAGATTGCTTGGAGAAGCAGTAATGAGAATGGGAGACCTCCACTCACTCCAAAAACAGAAACGAGAAATGGC  
 GGAACAATTAGGTCAGAAGTTTGAAGAAATAAGATGGTGTGATTGAAGAAGTGAGACACAACTGAAGGTAACAGAGAATAGTTTGGCAAATAACAT  
 TTATGCAAGCCTTACATCTATTGCTTGAAGTGGAGCAAGAGATAAAGAAGCTTCTCATTTTCAGCTTATTAAATAAAAAAACACCCTTGTCTACTAATAA  
**GAGACG**

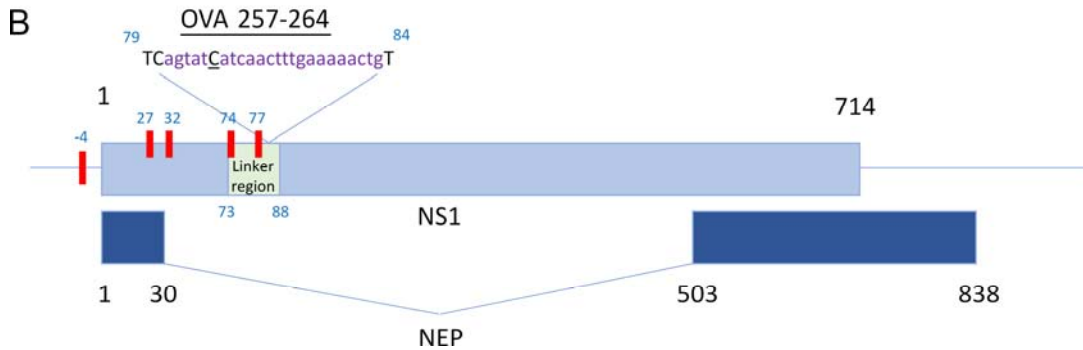

843

844

845 **Supplementary Figure S9: Design of PR8-NS.F3.SIIN virus.** Mutagenesis design for  
 846 inserting the OVA<sub>257-264</sub> (SIINFEKL) epitope into frame 3 of segment 8 of the influenza A  
 847 virus genome, in a region corresponding to the linker sequence of the NS1 protein (encoded  
 848 in frame 1). **(A)** A synthetic sequence designed for cloning into the plasmid pDUAL:NS,  
 849 which encodes segment 8 of the influenza A/Puerto Rico/8/1934(H1N1) (PR8) virus  
 850 backbone. BsmB1 restriction sites are indicated in red, and the start codon of NS1 and NEP is  
 851 highlighted in yellow. A sequence encoding SIINFEKL replaced codons 79 – 84 of NS1  
 852 (lowercase italic). The replacement sequence was flanked by two upstream nucleotides and  
 853 one downstream nucleotide to introduce a frameshift into frame 3; it was also subject to an  
 854 additional synonymous mutation to remove a stop codon in frame 1 (uppercase bold italic).  
 855 Frame 3 stop codons upstream of the replacement sequence (underlined) were eliminated by  
 856 point mutations that were synonymous in frame 1. **(B)** In a reverse genetic experiment, PR8  
 857 virus was generated using this sequence. The organisation of segment 8 of this virus is shown  
 858 schematically, with blue boxes indicating ORFs, a horizontal line indicating the UTRs of  
 859 frame 1, and red boxes indicating mutated frame 3 stop codons. Numbering of codon  
 860 positions is with respect to the NS1 and NEP start codon.

861

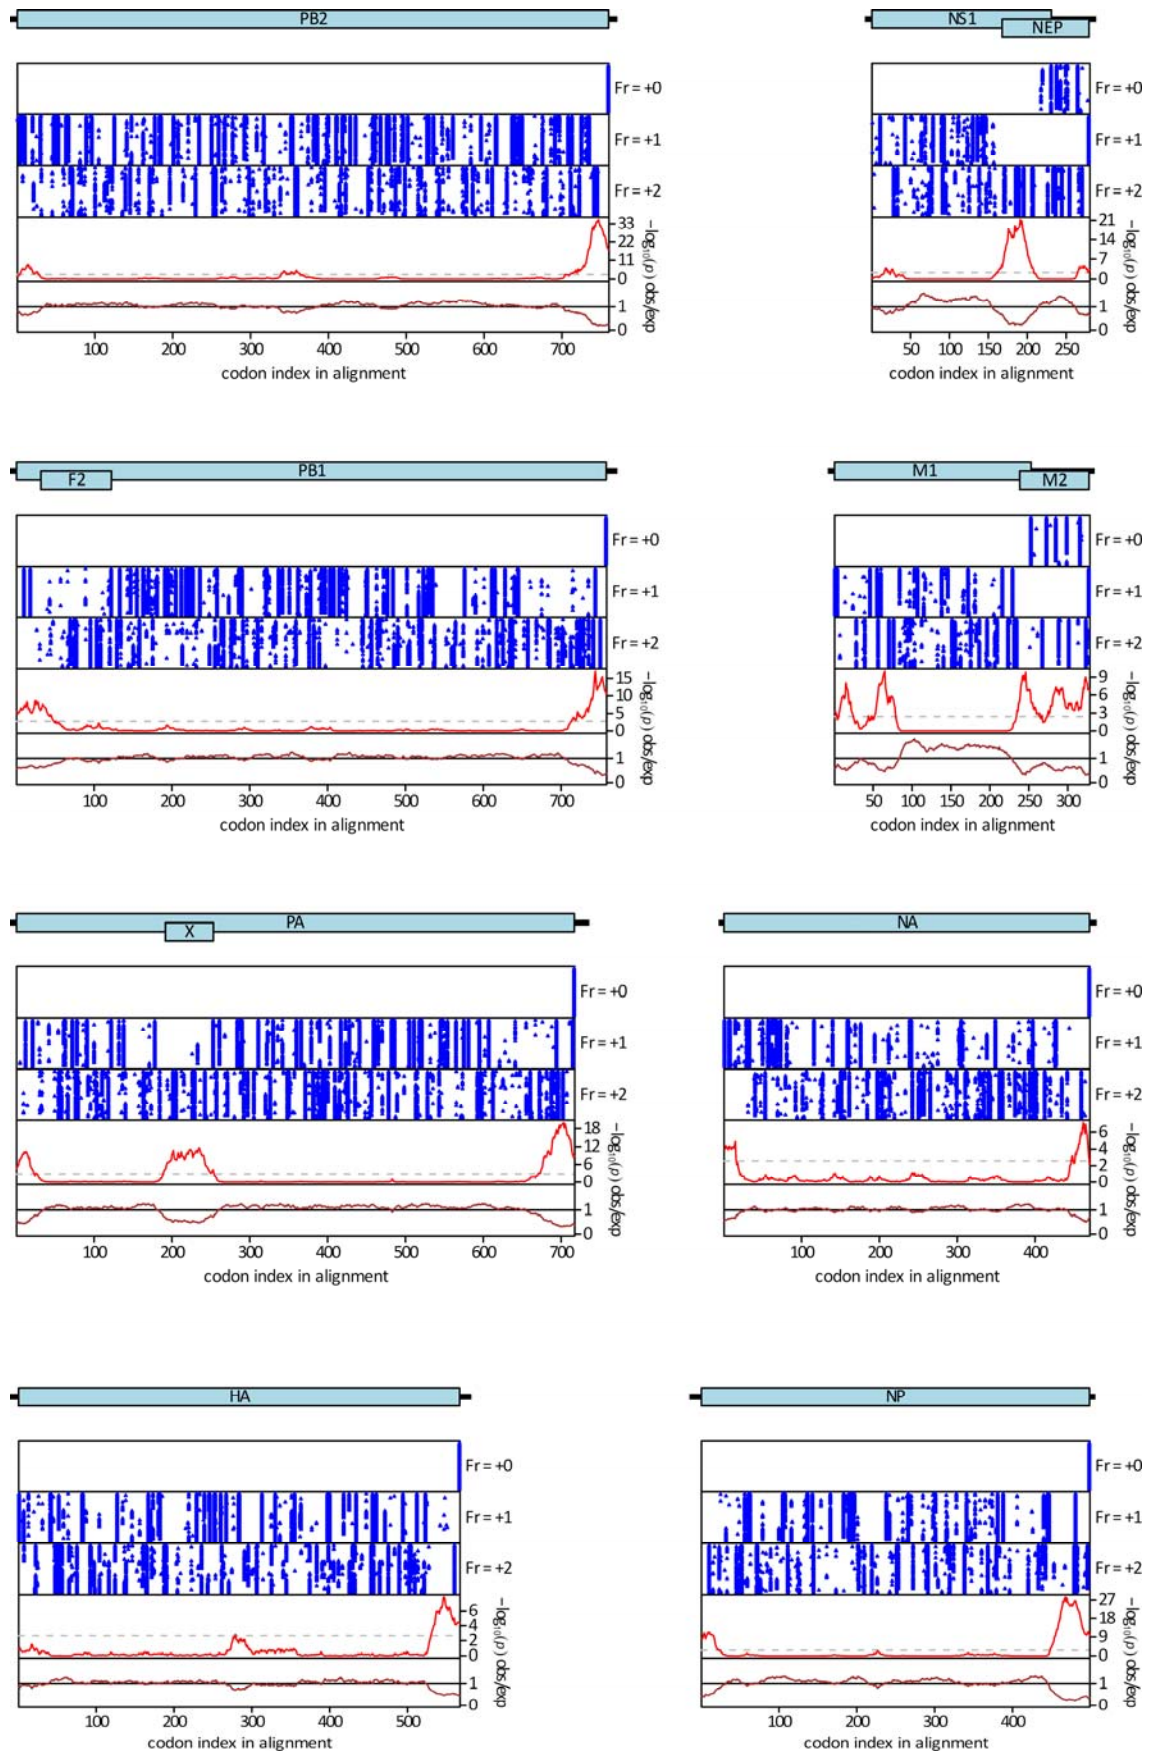

863

864 **Supplementary Figure S10:** The eight segments of the influenza A virus genome are shown  
865 as schematics, with pale blue rectangles indicating the coding sequences and black rectangles  
866 indicating the UTRs. Below each segment map, the upper three panels show the positions of  
867 stop codons (blue dots) in each of the three forward reading frames in each of the aligned  
868 sequences, within the coding regions of the segment. The lower two panels show the  
869 synonymous site conservation analysis: the red line shows the probability that the observed  
870 conservation could occur under a null model of neutral evolution at synonymous sites (with a  
871 dashed line indicating  $p = 0.05$  after multiple testing correction) and the brown line depicts  
872 the ratio of the observed number of substitutions to the number expected under the null model.  
873

## 874 [Supplementary Tables](#)

875

876 **Supplementary Table S1: Peptide spectral matches mapping to the 5'UTR of influenza**  
877 **A virus NP**

878 **Supplementary Table S2: Peribunyavirus sequences consulted**

879 **Supplementary Table S3: Details of putative uORFs in peribunyavirus L segments**

880 **Supplementary Table S4: Details of putative uORFs in peribunyavirus M segments**

881 **Supplementary Table S5: Details of putative uORFs in peribunyavirus S segments**

882

883 Supplementary Tables S1 – S5 are provided in the Excel spreadsheet

884 Sloan\_sNSVuORFS\_Supplementary\_Tables.xlsx

885

886

## 887 Financial Support

888 The authors acknowledge the following funding. ECH, ES and QG are supported by an MRC  
889 Career Development Award (MR/N008618/1), and ECH carried out the proteomics work  
890 when funded by an MRC Programme Grant to Prof Ervin Fodor, University of Oxford  
891 (MR/K000241/1). VR and IvK were supported by a Wellcome Trust Senior Investigator  
892 award (099220/Z/12/Z) awarded to Prof Richard M Elliott, University of Glasgow. RG and  
893 QG were supported by MRC grant (MC\_UU\_12014/12). JKB was supported by a Wellcome  
894 Trust Intermediate Clinical Fellowship (103258/Z/13/Z), a Wellcome-Beit Prize  
895 (103258/Z/13/A), and the UK Intensive Care Society. JKB and SC acknowledge the BBSRC  
896 Institute Strategic Programme Grant to the Roslin Institute. BW was supported by the  
897 SHIELD grant (MR/N02995X/1), Edinburgh Global Research Scholarship. AEF was  
898 supported by a Wellcome Trust grant (106207) and a European Research Council grant  
899 (646891). IB, PD and HMW were supported by an MRC project grant (MR/M011747/1). PD  
900 was supported by BBSRC Institute Strategic Programme grants (BB/J004324/1 and  
901 BB/P013740/1). JDJ was funded by a Wellcome Trust PhD scholarship. MA and MJA were  
902 supported by grants PTDC/BIA-CEL/32211/2017 and IF/00899/2013, respectively. MKMcM  
903 was supported by a Wellcome Investigator Award (210703/Z/18/Z).

## 904 Acknowledgements

905 The authors would like to thank Ervin Fodor, University of Oxford for support and critical  
906 comments on the project; Svenja Hester, Benjamin Thomas and Shabaz Mohammed of the  
907 Advanced Proteomics Facility, University of Oxford for proteomics; Elly Gaunt, University  
908 of Edinburgh for critical reading of the manuscript; and staff within the Institute of Infection,  
909 Immunity and Inflammation Flow Cytometry Facility, the Central Research Facility at the  
910 University of Glasgow, Thomas Purnell of the Institute of Infection, Immunity and  
911 Inflammation, University of Glasgow and Dimitris Athineos of the Beatson Institute for  
912 technical assistance and discussion.

913



## 914 References

- 915 1. Chirico N, Vianelli A, Belshaw R. Why genes overlap in viruses. *Proceedings of the*  
916 *Royal Society B: Biological Sciences*. 2010. doi:10.1098/rspb.2010.1052
- 917 2. Gago S, Elena SF, Flores R, Sanjuán R. Extremely high mutation rate of a  
918 hammerhead viroid. *Science* (80- ). 2009; doi:10.1126/science.1169202
- 919 3. Belshaw R, Pybus OG, Rambaut A. The evolution of genome compression and  
920 genomic novelty in RNA viruses. *Genome Res*. 2007; doi:10.1101/gr.6305707
- 921 4. Wise HM, Gaunt E, Ping J, Holzer B, Jasim S, Lycett SJ, et al. An alternative AUG  
922 codon that produces an N-terminally extended form of the influenza A virus NP is a  
923 virulence factor for a swine-derived virus. *bioRxiv*. 2019; 738427. doi:10.1101/738427
- 924 5. Hickman HD, Mays JW, Gibbs J, Kosik I, Magadán JG, Takeda K, et al. Influenza A  
925 Virus Negative Strand RNA Is Translated for CD8+ T Cell Immunosurveillance. *J*  
926 *Immunol*. 2018;201: 1222–1228. doi:10.4049/jimmunol.1800586
- 927 6. Vasin A V., Temkina OA, Egorov V V., Klotchenko SA, Plotnikova MA, Kiselev OI.  
928 Molecular mechanisms enhancing the proteome of influenza A viruses: An overview  
929 of recently discovered proteins. *Virus Research*. 2014.  
930 doi:10.1016/j.virusres.2014.03.015
- 931 7. Machkovech HM, Bloom JD, Subramaniam AR. Comprehensive profiling of  
932 translation initiation in influenza virus infected cells. Yewdell JW, editor. *PLOS*  
933 *Pathog*. 2019;15: e1007518. doi:10.1371/journal.ppat.1007518
- 934 8. Baltimore D. Expression of animal virus genomes. *Bacteriol Rev*. 1971;
- 935 9. Leppek K, Das R, Barna M. Functional 5' UTR mRNA structures in eukaryotic  
936 translation regulation and how to find them. *Nature Reviews Molecular Cell Biology*.  
937 2018. doi:10.1038/nrm.2017.103
- 938 10. Kochetov A V., Ahmad S, Ivanisenko V, Volkova OA, Kolchanov NA, Sarai A.  
939 uORFs, reinitiation and alternative translation start sites in human mRNAs. *FEBS Lett*.  
940 2008; doi:10.1016/j.febslet.2008.03.014
- 941 11. Decroly E, Ferron F, Lescar J, Canard B. Conventional and unconventional  
942 mechanisms for capping viral mRNA. *Nat Rev Microbiol*. 2012;10: 51–65.  
943 doi:10.1038/nrmicro2675
- 944 12. Young SK, Wek RC. Upstream open reading frames differentially regulate  
945 genespecific translation in the integrated stress response. *Journal of Biological*  
946 *Chemistry*. 2016. doi:10.1074/jbc.R116.733899
- 947 13. Calvo SE, Pagliarini DJ, Mootha VK. Upstream open reading frames cause widespread  
948 reduction of protein expression and are polymorphic among humans. *Proc Natl Acad*  
949 *Sci U S A*. 2009; doi:10.1073/pnas.0810916106
- 950 14. Johnstone TG, Bazzini AA, Giraldez AJ. Upstream ORF s are prevalent translational  
951 repressors in vertebrates . *EMBO J*. 2016; doi:10.15252/embj.201592759
- 952 15. Andreev DE, O'connor PB, Fahey C, Kenny EM, Terenin IM, Dmitriev SE, et al.  
953 Translation of 5' leaders is pervasive in genes resistant to eIF2 repression. *Elife*. 2015;  
954 doi:10.7554/eLife.03971
- 955 16. Elfakess R, Dikstein R. A translation initiation element specific to mRNAs with very  
956 short 5'UTR that also regulates transcription. *PLoS One*. 2008;  
957 doi:10.1371/journal.pone.0003094
- 958 17. Dikstein R. Transcription and translation in a package deal: The TISU paradigm. *Gene*.  
959 2012. doi:10.1016/j.gene.2011.09.013
- 960 18. Haimov O, Sinvani H, Martin F, Ulitsky I, Emmanuel R, Tamarkin-Ben-Harush A, et  
961 al. Efficient and Accurate Translation Initiation Directed by TISU Involves RPS3 and  
962 RPS10e Binding and Differential Eukaryotic Initiation Factor 1A Regulation. *Mol Cell*



- 963 Biol. 2017; doi:10.1128/mcb.00150-17
- 964 19. Caton AJ, Robertson S. Structure of the host-derived sequences present at the 5' ends  
965 of influenza virus mRNA. *Nucleic Acids Res.* 1980; doi:10.1093/nar/8.12.2591
- 966 20. Koppstein D, Ashour J, Bartel DP. Sequencing the cap-snatching repertoire of H1N1  
967 influenza provides insight into the mechanism of viral transcription initiation. *Nucleic*  
968 *Acids Res.* 2015; doi:10.1093/nar/gkv333
- 969 21. Sikora D, Rocheleau L, Brown EG, Pelchat M. Influenza A virus cap-snatches host  
970 RNAs based on their abundance early after infection. *Virology.* 2017;  
971 doi:10.1016/j.virol.2017.06.020
- 972 22. Clohisey S, Parkinson N, Wang B, Bertin N, Wise H, Tomoiu A, et al. Comprehensive  
973 characterisation of molecular host-pathogen interactions in influenza A virus-infected  
974 human macrophages. *bioRxiv.* 2019; doi:10.1101/670919
- 975 23. Bishop DHL, Gay ME, Matsuoko Y. Nonviral heterogeneous sequences are present at  
976 the 5' ends of one species of snowshoe hare bunyavirus S complementary RNA.  
977 *Nucleic Acids Res.* 1983; doi:10.1093/nar/11.18.6409
- 978 24. Bouloy M, Pardigon N, Vialat P, Gerbaud S, Girard M. Characterization of the 5' and  
979 3' ends of viral messenger RNAs isolated from BHK21 cells infected with germiston  
980 virus (bunyavirus). *Virology.* 1990; doi:10.1016/0042-6822(90)90185-T
- 981 25. Eshita Y, Ericson B, Romanowski V, Bishop DHL. Analyses of the mRNA  
982 transcription processes of snowshoe hare bunyavirus S and M RNA species. *J Virol.*  
983 1985;
- 984 26. Jin H, Elliott RM. Non-viral sequences at the 5' ends of Dugbe nairovirus S mRNAs. *J*  
985 *Gen Virol.* 1993; doi:10.1099/0022-1317-74-10-2293
- 986 27. Jin H, Elliott RM. NONVIRAL SEQUENCES AT THE 5' ENDS OF DUGBE  
987 NAIROVIRUS-S MESSENGER-RNAS. *J Gen Virol.* 1993;
- 988 28. Hutchinson EC. Influenza Virus. *Trends Microbiol.* 2018;26.  
989 doi:10.1016/j.tim.2018.05.013
- 990 29. Brault AC, Savage HM, Duggal NK, Eisen RJ, Staples JE. Heartland virus  
991 epidemiology, vector association, and disease potential. *Viruses.* 2018.  
992 doi:10.3390/v10090498
- 993 30. Sakkas H, Bozidis P, Franks A, Papadopoulou C. Oropouche fever: A review. *Viruses.*  
994 2018. doi:10.3390/v10040175
- 995 31. Fodor E, Crow M, Mingay LJ, Deng T, Sharps J, Fechter P, et al. A Single Amino  
996 Acid Mutation in the PA Subunit of the Influenza Virus RNA Polymerase Inhibits  
997 Endonucleolytic Cleavage of Capped RNAs. *J Virol.* 2002;  
998 doi:10.1128/jvi.76.18.8989-9001.2002
- 999 32. Bercovich-Kinori A, Tai J, Gelbart IA, Shitrit A, Ben-Moshe S, Drori Y, et al. A  
1000 systematic view on influenza induced host shutoff. *Elife.* 2016;  
1001 doi:10.7554/eLife.18311
- 1002 33. Slavoff SA, Mitchell AJ, Schwaid AG, Cabili MN, Ma J, Levin JZ, et al. Peptidomic  
1003 discovery of short open reading frame-encoded peptides in human cells. *Nat Chem*  
1004 *Biol.* 2013; doi:10.1038/nchembio.1120
- 1005 34. Jaber T, Yuan Y. A Virally Encoded Small Peptide Regulates RTA Stability and  
1006 Facilitates Kaposi's Sarcoma-Associated Herpesvirus Lytic Replication. *J Virol.* 2013;  
1007 doi:10.1128/jvi.02746-12
- 1008 35. Su M, Ling Y, Yu J, Wu J, Xiao J. Small proteins: Untapped area of potential  
1009 biological importance. *Frontiers in Genetics.* 2013. doi:10.3389/fgene.2013.00286
- 1010 36. Thulasi Raman SN, Zhou Y. Networks of host factors that interact with NS1 protein of  
1011 influenza a virus. *Front Microbiol.* 2016; doi:10.3389/fmicb.2016.00654
- 1012 37. Bottermann M, Foss S, Van Tienen LM, Vaysburd M, Cruickshank J, O'Connell K, et

- 1013 al. TRIM21 mediates antibody inhibition of adenovirus-based gene delivery and  
1014 vaccination. *Proc Natl Acad Sci U S A*. 2018;115. doi:10.1073/pnas.1806314115
- 1015 38. Sachs MS, Geballe AP. Downstream control of upstream open reading frames. *Genes*  
1016 *Dev*. 2006; doi:10.1101/gad.1427006
- 1017 39. Kearse MG, Wilusz JE. Non-AUG translation: A new start for protein synthesis in  
1018 eukaryotes. *Genes and Development*. 2017. doi:10.1101/gad.305250.117
- 1019 40. Firth AE, Brierley I. Non-canonical translation in RNA viruses. *J Gen Virol*.  
1020 2012/04/27. 2012;93: 1385–1409. doi:10.1099/vir.0.042499-0
- 1021 41. Shabman RS, Hoenen T, Groseth A, Jabado O, Binning JM, Amarasinghe GK, et al.  
1022 An Upstream Open Reading Frame Modulates Ebola Virus Polymerase Translation  
1023 and Virus Replication. *PLoS Pathog*. 2013; doi:10.1371/journal.ppat.1003147
- 1024 42. Chen A, Kao YF, Brown CM. Translation of the first upstream ORF in the hepatitis B  
1025 virus pregenomic RNA modulates translation at the core and polymerase initiation  
1026 codons. *Nucleic Acids Res*. 2005; doi:10.1093/nar/gki251
- 1027 43. Donzé O, Damay P, Spahr P francois. The first and third uORFs in RSV leader RNA  
1028 are efficiently translated: Implications for translational regulation and viral RNA  
1029 packaging. *Nucleic Acids Res*. 1995; doi:10.1093/nar/23.5.861
- 1030 44. Cao J, Geballe AP. Translational inhibition by a human cytomegalovirus upstream  
1031 open reading frame despite inefficient utilization of its AUG codon. *J Virol*. 1995;
- 1032 45. Biegalko BJ, Geballe AP. Translational inhibition by cytomegalovirus transcript  
1033 leaders. *Virology*. 1990; doi:10.1016/0042-6822(90)90531-U
- 1034 46. Lulla V, Dinan AM, Hosmillo M, Chaudhry Y, Sherry L, Irigoyen N, et al. An  
1035 upstream protein-coding region in enteroviruses modulates virus infection in gut  
1036 epithelial cells. *Nat Microbiol*. 2019; doi:10.1038/s41564-018-0297-1
- 1037 47. Sinvani H, Haimov O, Svitkin Y, Sonenberg N, Tamarkin-Ben-Harush A, Viollet B, et  
1038 al. Translational tolerance of mitochondrial genes to metabolic energy stress involves  
1039 TISU and eIF1-eIF4GI cooperation in start codon selection. *Cell Metab*. 2015;  
1040 doi:10.1016/j.cmet.2015.02.010
- 1041 48. Atger F, Gobeta C, Marquis J, Martin E, Wang J, Weger B, et al. Circadian and  
1042 feeding rhythms differentially affect rhythmic mRNA transcription and translation in  
1043 mouse liver. *Proc Natl Acad Sci U S A*. 2015; doi:10.1073/pnas.1515308112
- 1044 49. Gandin V, Masvidal L, Hulea L, Gravel SP, Cargnello M, McLaughlan S, et al.  
1045 NanoCAGE reveals 5' UTR features that define specific modes of translation of  
1046 functionally related MTOR-sensitive mRNAs. *Genome Res*. 2016;  
1047 doi:10.1101/gr.197566.115
- 1048 50. Ma Y, Angel M, Wang G, Ho JSY, Zhao N, Noel J, et al. Discovery of UFO Proteins:  
1049 Human-Virus Chimeric Proteins Generated During Influenza Virus Infection. *bioRxiv*.  
1050 2019; doi:10.1101/597617
- 1051 51. Andrews SJ, Rothnagel JA. Emerging evidence for functional peptides encoded by  
1052 short open reading frames. *Nature Reviews Genetics*. 2014. doi:10.1038/nrg3520
- 1053 52. Wen Y, Liu Y, Xu Y, Zhao Y, Hua R, Wang K, et al. Loss-of-function mutations of an  
1054 inhibitory upstream ORF in the human hairless transcript cause Marie Unna hereditary  
1055 hypotrichosis. *Nat Genet*. 2009; doi:10.1038/ng.276
- 1056 53. Hutchinson EC, von Kirchbach JC, Gog JR, Digard P. Genome packaging in influenza  
1057 A virus. *J Gen Virol*. 2010;91. doi:10.1099/vir.0.017608-0
- 1058 54. Gog JR, Dos Santos Afonso E, Dalton RM, Leclercq I, Tiley L, Elton D, et al. Codon  
1059 conservation in the influenza A virus genome defines RNA packaging signals. *Nucleic*  
1060 *Acids Res*. 2007; doi:10.1093/nar/gkm087
- 1061 55. Dadonaite B, Gilbertson B, Knight ML, Trifkovic S, Rockman S, Laederach A, et al.  
1062 The structure of the influenza A virus genome. *Nat Microbiol*. 2019;

- 1063 doi:10.1038/s41564-019-0513-7
- 1064 56. Jagger BW, Wise HM, Kash JC, Walters KA, Wills NM, Xiao YL, et al. An  
1065 overlapping protein-coding region in influenza A virus segment 3 modulates the host  
1066 response. *Science* (80- ). 2012; doi:10.1126/science.1222213
- 1067 57. Trifonov V, Racaniello V, Rabadan R. The contribution of the PB1-F2 protein to the  
1068 fitness of influenza A viruses and its recent evolution in the 2009 Influenza A (H1N1)  
1069 pandemic virus. *PLoS Curr*. 2009; doi:10.1371/currents.RRN1006
- 1070 58. Gaunt E, Wise HM, Zhang H, Lee LN, Atkinson NJ, Nicol MQ, et al. Elevation of  
1071 CpG frequencies in influenza a genome attenuates pathogenicity but enhances host  
1072 response to infection. *Elife*. 2016; doi:10.7554/eLife.12735
- 1073 59. Ling R, Pate AE, Carr JP, Firth AE. An essential fifth coding ORF in the  
1074 sobemoviruses. *Virology*. 2013; doi:10.1016/j.virol.2013.05.033
- 1075 60. Fang Y, Treffers EE, Li Y, Tas A, Sun Z, Van Der Meer Y, et al. Efficient - 2  
1076 Frameshifting by mammalian ribosomes to synthesize an additional arterivirus protein.  
1077 *Proc Natl Acad Sci U S A*. 2012; doi:10.1073/pnas.1211145109
- 1078 61. Wei J, Yewdell JW. Autoimmune T cell recognition of alternative-reading-frame-  
1079 encoded peptides. *Nature Medicine*. 2017. doi:10.1038/nm.4317
- 1080 62. Wei J, Kishton RJ, Angel M, Conn CS, Dalla-Venezia N, Marcel V, et al. Ribosomal  
1081 Proteins Regulate MHC Class I Peptide Generation for Immunosurveillance. *Mol Cell*.  
1082 2019; doi:10.1016/j.molcel.2018.12.020
- 1083 63. Dolan BP, Li L, Takeda K, Bennink JR, Yewdell JW. Defective Ribosomal Products  
1084 Are the Major Source of Antigenic Peptides Endogenously Generated from Influenza  
1085 A Virus Neuraminidase. *J Immunol*. 2010; doi:10.4049/jimmunol.0901907
- 1086 64. Wei J, Yewdell JW. Flu DRiPs in MHC Class I Immunosurveillance. *Virologica*  
1087 *Sinica*. 2019. doi:10.1007/s12250-018-0061-y
- 1088 65. Zanker DJ, Oveissi S, Tschärke DC, Duan M, Wan S, Zhang X, et al. Influenza A  
1089 Virus Infection Induces Viral and Cellular Defective Ribosomal Products Encoded by  
1090 Alternative Reading Frames. *J Immunol*. 2019; doi:10.4049/jimmunol.1900070
- 1091 66. Hutchinson EC, Curran MD, Read EK, Gog JR, Digard P. Mutational analysis of cis-  
1092 acting RNA signals in segment 7 of influenza a virus. *J Virol*. 2008;82.  
1093 doi:10.1128/JVI.01634-08
- 1094 67. Hutchinson EC, Charles PD, Hester SS, Thomas B, Trudgian D, Martínez-Alonso M,  
1095 et al. Conserved and host-specific features of influenza virion architecture. *Nat*  
1096 *Commun*. 2014;5. doi:10.1038/ncomms5816
- 1097 68. Gauth CR, Smith TF. Replication and plaque assay of influenza virus in an established  
1098 line of canine kidney cells. *Appl Microbiol*. 1968;16: 588–594. Available:  
1099 <https://www.ncbi.nlm.nih.gov/pubmed/5647517>
- 1100 69. Benfield CT, Lyall JW, Kochs G, Tiley LS. Asparagine 631 variants of the chicken  
1101 Mx protein do not inhibit influenza virus replication in primary chicken embryo  
1102 fibroblasts or in vitro surrogate assays. *J Virol*. 2008;82: 7533–7539.  
1103 doi:10.1128/JVI.00185-08
- 1104 70. Rezelj V V., Mottram TJ, Hughes J, Elliott RM, Kohl A, Brennan B. M Segment-  
1105 Based Minigenomes and Virus-Like Particle Assays as an Approach To Assess the  
1106 Potential of Tick-Borne Phlebovirus Genome Reassortment . *J Virol*. 2018;  
1107 doi:10.1128/jvi.02068-18
- 1108 71. Tilston-Lunel NL, Shi X, Elliott RM, Acrani GO. The potential for reassortment  
1109 between oropouche and schmallenberg orthobunyaviruses. *Viruses*. 2017;  
1110 doi:10.3390/v9080220
- 1111 72. de Wit E, Spronken MI, Bestebroer TM, Rimmelzwaan GF, Osterhaus AD, Fouchier  
1112 RA. Efficient generation and growth of influenza virus A/PR/8/34 from eight cDNA

- 1113 fragments. *Virus Res.* 2004;103: 155–161. doi:10.1016/j.virusres.2004.02.028
- 1114 73. Ye J, Sorrell EM, Cai Y, Shao H, Xu K, Pena L, et al. Variations in the Hemagglutinin  
1115 of the 2009 H1N1 Pandemic Virus: Potential for strains with altered virulence  
1116 phenotype? *PLoS Pathog.* 2010; doi:10.1371/journal.ppat.1001145
- 1117 74. Moncorge O, Long JS, Cauldwell A V., Zhou H, Lycett SJ, Barclay WS. Investigation  
1118 of Influenza Virus Polymerase Activity in Pig Cells. *J Virol.* 2013;  
1119 doi:10.1128/jvi.01633-12
- 1120 75. Chung BY, Hardcastle TJ, Jones JD, Irigoyen N, Firth AE, Baulcombe DC, et al. The  
1121 use of duplex-specific nuclease in ribosome profiling and a user-friendly software  
1122 package for Ribo-seq data analysis. *RNA.* 2015; doi:10.1261/rna.052548.115
- 1123 76. Irigoyen N, Firth AE, Jones JD, Chung BYW, Siddell SG, Brierley I. High-Resolution  
1124 Analysis of Coronavirus Gene Expression by RNA Sequencing and Ribosome  
1125 Profiling. *PLoS Pathog.* 2016; doi:10.1371/journal.ppat.1005473
- 1126 77. Hutchinson EC, Stegmann M. Purification and Proteomics of Influenza Virions.  
1127 *Methods in Molecular Biology.* 2018. doi:10.1007/978-1-4939-8678-1\_5
- 1128 78. Tyanova S, Temu T, Cox J. The MaxQuant computational platform for mass  
1129 spectrometry-based shotgun proteomics. *Nat Protoc.* 2016;11: 2301–2319.  
1130 doi:10.1038/nprot.2016.136
- 1131 79. Schwanhauser B, Busse D, Li N, Dittmar G, Schuchhardt J, Wolf J, et al. Global  
1132 quantification of mammalian gene expression control. *Nature.* 2011;473: 337–342.  
1133 doi:10.1038/nature10098
- 1134 80. Takahashi H, Lassmann T, Murata M, Carninci P. 5' end-centered expression profiling  
1135 using cap-analysis gene expression and next-generation sequencing. *Nat Protoc.* 2012;  
1136 doi:10.1038/nprot.2012.005
- 1137 81. Forrest ARR, Kawaji H, Rehli M, Baillie JK, De Hoon MJL, Haberle V, et al. A  
1138 promoter-level mammalian expression atlas. *Nature.* 2014; doi:10.1038/nature13182
- 1139 82. Katoh K. MAFFT: a novel method for rapid multiple sequence alignment based on fast  
1140 Fourier transform. *Nucleic Acids Res.* 2002; doi:10.1093/nar/gkf436
- 1141 83. Stuller KA, Cush SS, Flaño E. Persistent  $\gamma$ -herpesvirus infection induces a CD4 T cell  
1142 response containing functionally distinct effector populations (*Journal of Immunology*  
1143 (2010) 184, (3850-3856)). *J Immunol.* 2010; doi:10.4049/jimmunol.1090040
- 1144 84. Westerhof LM, McGuire K, MacLellan L, Flynn A, Gray JI, Thomas M, et al.  
1145 Multifunctional cytokine production reveals functional superiority of memory CD4  
1146 T cells. *Eur J Immunol.* 2019; doi:10.1002/eji.201848026
- 1147 85. Hogquist KA, Jameson SC, Heath WR, Howard JL, Bevan MJ, Carbone FR. T cell  
1148 receptor antagonist peptides induce positive selection. *Cell.* 1994; doi:10.1016/0092-  
1149 8674(94)90169-4
- 1150 86. Altschul SF, Gish W, Miller W, Myers EW, Lipman DJ. Basic local alignment search  
1151 tool. *J Mol Biol.* 1990; doi:10.1016/S0022-2836(05)80360-2
- 1152 87. Edgar RC. MUSCLE: A multiple sequence alignment method with reduced time and  
1153 space complexity. *BMC Bioinformatics.* 2004; doi:10.1186/1471-2105-5-113
- 1154 88. Firth AE. Mapping overlapping functional elements embedded within the protein-  
1155 coding regions of RNA viruses. *Nucleic Acids Res.* 2014; doi:10.1093/nar/gku981
- 1156 89. Guindon S, Gascuel O. A Simple, Fast, and Accurate Algorithm to Estimate Large  
1157 Phylogenies by Maximum Likelihood. *Syst Biol.* 2003;  
1158 doi:10.1080/10635150390235520
- 1159
